# Supplementary material for: Comparative Transcriptome Analysis of Genes Involved in GA-GID1-DELLA Regulatory Module in Symbiotic and Asymbiotic Seed Germination of Anoectochilus roxburghii (Wall.) Lindl. (Orchidaceae)
Source: Int J Mol Sci. 2015 Dec 18;16(12):30190–203. doi: 10.3390/ijms161226224 (PMC4691166; doi:10.3390/ijms161226224)
Supplement: Supplementary file 1 [file ijms-16-26224-s001.xlsx]

## Sheet: Figure S1
Figure S1. Pearson correlation between samples.

## Sheet: Table S1
Table S1. Unigene list involved in GA-GID1-DELLA regulatory module.
Gene Name	Gene Number	Gene IDs
ent-Copalyl diphosphate synthase (CPS)	2	c112106_g1,c70850_g
ent-Kaurene synthase (KS)	1	c109593_g1
ent-Kaurene oxidase (KO)	2	c121406_g1,c112559_g1
ent-Kaurenoic acid oxidase (KAO)	1	c96842_g1
GA20-oxidase (GA20ox)	9	c99861_g1,c95037_g1,c12103_g1,c99861_g2,c90765_g1,c105719_g1,c147493_g1,c41926_g1,c104197_g2
GA3 beta-hydroxylase (GA3ox)	5	c42659_g1,c121559_g1,c116220_g1,c105461_g1,c112636_g1
GA2-oxidase (GA2ox)	11	c178184_g1,c141550_g1,c93840_g1,c100955_g1,c106822_g1,c99070_g1,c106997_g2,c106997_g1,c87256_g1,c106250_g1,c106769_g1
GA receptor GID1	5	c108026_g1,c106348_g1,c169104_g1,c109681_g1,c111827_g2
DELLA family protein	11	c93009_g1,c101215_g1,c93049_g1,c93419_g1,c112848_g1,c112848_g2,c85242_g1,c103504_g1,c113840_g1,c89242_g1,c97907_g1
F-box protein GID2	2	c94752_g1,c100303_g1
Total Number	49

## Sheet: Table S2
Table S2. 49 GA-related unigenes sequences
>c178184_g1
TAATAATAGAAATAATGCTTCTATTGAAGAAGTTCTTCAGAGTTATCTTCCATTTGTTCAGGCAAGAAACCTTGGAAGGC
CAACTTTGCGTCCAAACAACTTCACATCCTCTTTGATTTGCATCTTATATTCCATGAAGGTGAAGGGCCTGTAAAGAGAT
GGTGACTTATGGCTTTTGATGATAGTTCCATAAGAAGGGCATAGCTGAAAGGCTGCAGAGAACCTCTCAGCCTTTGGACT
TGCCATTACTCTATGCTCAACACTTTTGTACACACCATTGCTCCATGCCTGGAACAAGTCACCAATATTG
>c147493_g1
TCTCTTTCGCATGTTGACAGCTTGTTCTATTTGTGCTTGTGCAACTCGAGGTAGATGAAGAAGCTGCTCGCAGACTTCTG
GAGCTCATGTCCCTCATCCGGGGCCTGCACGGAAACCGCCTGACCAGCTTCTTCGACGATGACACGATCCGCATCCGGCC
GAATCACTACCCTCCGTGCCCGTAACCGCAGCTCGGTCTCGGCTTCGGGCGACACAATGATTGCGGCGCGCTCTCCGTCC
TCTTCCAGGACGAAACCGGCGGCCTCGATGTCAGCCGCAAGAGCGACGGCGAGTGG
>c93009_g1
CTGCCGCCGCGTTCACGTCATCGACTTTGGCATAAAACAGGGTATGCAGTGGCCGGCGCTTTTGCAGGCGCTCGCTCTCC
GCCCCGGCGGACCCCCTTCCTTCCGCCTTACCGGAATCGGCCCCCCTCAGCCGGACAACTCTGACGCGCTGCAACAAGTC
GGATGGAAGCTCGCCCAGCTTGCCAGCACCATCCACGTCGAGTTTGAGTACCGCGGCTTTGTCGCCAACAGCCTTGCCGA
TCTGGAGGTTTTCATGCTCGAATCCCCGCTGTCATCAAGCGGAGGATCGGCAGAGCCGCAGGTAGTGGCGATCAATTCCG
TCTTCGAGCTCCACAGCCTCCTGGCACGGCCAGGGGCACTTGAGAAGCTTCTATCCACCGTCCGATCCGTGCGGCCGCGG
ATTCTGACCGTCGTCGAGCAAGAAGCTAACCATAACGCGAGTGGCTTGTTGGAGAGGTTTACCGAAGCGCTGCACTACTA
CTCGTCGATGTTCGATTCGTTAGAAGGAGGCGGCGGCGGAGCCGGAGACGGCGAATGGCAGCAAGACCAAATAATGTCGG
AGGTGTTCCTCGGCCGGCAGATCTGCAACGTGGTTGCCTGCGAGGGTGCGGAGAGGACAGAGCGGCACGAGACCCTCGAT
CAGTGGAGGGCGCGGATGGCCCGCGCCGGCTTTCAGCCGGTCCACCTCGGGTCGAACGCCTTCAAGCAGGCGAGCATGCT
GCTTGCCCTCTTCGCCGGCGGCGACGGCTACCGCGTAGAGGAAAAGGAAGGGCACCTCACTCTTGGCTGGCACACTCGCC
CACTTATCGCCACATCCGCCTGGCGCGTCTCCGGTGCCAGCGTGTCCGGCCAATCTTCCGGCGGCGCGGCGCACTGATGC
TGCCGCGATTCGGTTGGTTGATCTCGCCGCCGTCCATCCGGCGGCGAACGTGGCTAAGGCCATTAATGTTAATTTTAGTT
TTTCCTTTTTTAATAATTGTCTTTTTTCTTAGAGTATGAAAACTTATGTGTACTTATTTAGCGCTACGCTGAAGAGAATT
TTTAAATAATAATTAATATTAATCCGTGCTATTATATTTTAATCAACTAAAT
>c101215_g1
ATTTATTTATTTATTATTTTTTTATTATGAGAGACGGAGAAAAGCGGTAAGTACGAAAACTGAGACGGAAGCTTCTCCAT
TAAATTGACGCGAAGCCTCCTTCTTCCACCTCACAAATCTGAAATCTCCGCGGCTGGCTGCTCTCTGCTCGCTTCACTGC
TTTCCTCGCCGGTGTTACTTTTCTGCCGTCTTTGCTTTCCACGTCCCCCCCTCTCCGGTGATTATTAATTTGCTTCTTCA
GTATCGGGAAGCTGCGAGATGAAGAGGGAGCATGTGGATGGGGATCAGTATGATCCGATGGGAAAGGGGAGGATGATGCC
GATGGAACAGGAGATGGACGCCGGGATGGACGAGCTTCTGGCTGTGCTTGGCTACAAGGTGAGGAGCTCAGACATGGCGG
AAGTGGCGCAGAAGCTGGAGCAGCTCGACAGGGCAATGGGGTGCAGCGCTACGCTGGAAGATGCGCTGCTTTCTCACCTT
GCCGCCGACACAGTGCACTACAATCCCTCCGATCTTTCGAGTTGGGTCGAGAGCATGATGTCCGAGCTGAATAGCTCTAG
CGCTTTCGATCTCCGGCCTCTTGACTCGTCTTCCTCATTTCTTCAATCCGCCAGACCCGCGGTGGATTTCTCGTCTGCGG
CCGATGATTACCTGCTTTGGTCTGATTGCGCTCCCCGCCCTCCCGGAGCTGGTTCTTACAGCATCCAGTGCGGCTTGGAG
ACGCAGATGGAAAGGGGACCAAGGGATCGTAAACGGTTGAAGGCCTCTTCGCCACCATCTTTTTCAACTTCTTTCAACGT
AGAAGCGATCCCGATGCCAGCATCCGCCACCGCCGCCACGGAAGCGCCCCCTGTTCTTCCAATGATGGCGAGAGATGACT
CGCATGAGGCCGGAATCCGCCTCGTGCATGCTCTGCTGGCCTGCGCGGTAGCTGTAGAGCAAGAGAATTACAAATCGGCC
GACGCCATCATGAAGCAGATATCCGCGCTCTCCTCATTCCAACGCGGCGCGATTCAGAAGGTCGCTGGCTACTTCGCCGA
AGCCCTCGCCTGCCGGATTTACCGCTTCCGCCCCAACCAAGACTTCTCCCTCGACTCCGCCTTCTCCGATATCCTCCAGA
TGCACTTT
>c108026_g1
CCTAACCTAACTGAAGCAGCACCCACAAGTTAATCCATTGTTGGATCCCAAAATGACTAGTAAAGGATTGAACGGCTAGC
GTGGGAGACATTATTATTATGCTAATACAAGATTAAAAATTGACCATTAGATCTAAATATATTATGTTAGCTCATTGTTG
AGATGATTTATTTATTATATTTTGTATTATTACTCAGCTTTAGTGATCCACATTTGCCGCGCTGAAATGAGAGGGAGCAA
ACTACAAATGCTTCAACAAGATCGGGGAGAAACGGCACGCGTCACACCTTCCGGCATTGAATCCGATCTTTAAATAAAAA
TATAACACACTCTCCCTCCCACCACCATCATTTCCCCTTCTCTCTTTCCCAGCAACCATGAACCCCTTCTCCTTCCTTAA
GATTTCCCTCAACCCCGACGGCTCCCTCACCCGCCACGCCCAGTTCCCCATTTCCCCCACCAACGCCTCAGACCGCTCCC
TCCCCTCACTTTCCAAGGACGTACCTCTCAACCCCGCCCACGATACCTGGATCCGCATCTTCCTCCCCTCCTCTCCTCCT
CCCTCCCTCTACTCCCTCCCCATCATCATCTACTTCCACGGAGGCGGTTTCATCCTCTTCAGCGCCGCCTCCGCCCCCTT
TCACTCCAACTGCTCACGCTTTGCTGCCTCACTCCCCGCCATCGTTCTCTCCGTCGAATACCGTCTTGCACCAGAGCACC
GCCTCCCCGCCGCCTACCAAGACGCCCACGACGCCATCATATGGCTCCGCGACCAGGCGCTAAACCCCTCCGCTGCTGAC
CCCTGGCTCCGAGACCACGCTGACTTCTCCCGCTGCTTCATCATGGGCAGCAGCGCAGGCGGAAACATCGCCTATCAGGC
GGCGCTCCGGGCAGTGGGGATAGATCTCGCTCCGCTGAAGCTGGAGGGGCTGATACTGATCCAGCCGTTCTTTGGAGGGG
AGGGGCGGACGGAGTCAGAAAAGAGGATGGCAGATGACTTAATCATTCCGCTTCCGACGAATGACCTGATGTGGGAGCTG
TGTTTGCCGGCGGGAGCAAACAGGGATCATGAGTATAGCAACCCGGCGGCGAAGGAGGAGGAGGCAGTGGGCAGATTGCC
GCCATGCTTGGTGCGGGGGTATTTGGGGGATCCGCTGATCGATCGGCAGCGGGACCTGACACGGATGCTGGAGAGGAGAG
GAGTGAAGGTGGTGGGGTTGCTGGACGAGGACGGCCACCATGGCATCGAGCTTATTAAGCCAGAAAAAGCGGACGCGCTC
GTTGAACGTGTTCAAGGATTCGTCTGCGGGAGCGCCGGCAAGCATAAGCTCTGAAAGTGAAAGGGGGCAATTAATTTCAG
ATCAATTTGGGTGATTACTAGAGTCAGGACATCTGGTGAAGGTCCCGAGTAGTGGAGCTTCTTCTTGAGGGTTTGAGTTG
TCTGAAATGTTTCCAGCCATACCATTTTGGGTTGTATGTTTGATATACTTTTAAGTACTTTATTTTCTTCACATACTGTT
TTCTTATATATCTTTTGGGACCAGTGTATTGGTCTATCAATATTTCCGGTCAGTTAATTGTGATGTGATGGACTGTTGTT
ACTTTTTGCATTTATTATTTTCAATTTAATTTTTTAGCTTTCAA
>c97907_g1
CATTAATCTAGCATTATTTGAATTTAGGGAAAATAAATAAAAAAATAAATCAAGATCTCAAGATACATATTTTCACAAAA
AGAAAAAAATTAAAACAATTCTAAAAAAAAACCCCGGCCGTTGCTGCCCTACCGCCGCAGATGGCGAGAATCCATATATT
ATAGAGCGGGAGTTGCAGCGGCGGCAGACGAGACAGCGACTGCGTCGGCGACATGCCAGGCGGAGGTGGCGATGAGTGGT
CGAGAGTGCCAACCAAGCGTCAGGCAGCCTTCCCTCTCCTCGACGCAGTACCCATCGCCGCCGGCGAAGAGCGCGAGCAG
CATACTCGCCTGCTTGAACGCGTTTGAGCCAAGGTGCACCGGCTGAAACCCTGCTCCACCCATCCTAGCCCGCCATTGCT
CCAGGGTCTCATGCCGCTCCGTCCTCTCCGGCCCTTCGCATGCCACCACATTGCAGATCTGCCGGCCGAGAAACATCTCC
GTCATCACATGCTCCGCCTGCCCCTCGCCACCCTCCAGCGAATCGAACAGAGTTGAGTAGTAGTGCAGCGACTCAGTGAA
CCGCTCTACAAATCCACCAGCATTGTGGTTCGCTTCCTGCTCGACGACTGTCATAATCCGGGGGCGCACCACTCGAACGA
CATTGAGTACCTTCTCTATCGACCCCGGGATCGCGAGGAGGCCGTGGAGCTCGAAAACGGAGTTGACGGCCACCGTCTCC
GGCTCTGCTGATCCCCCTATTAGCATGTAGGGATTAATGTCGGCAATGGTGTTGGCAACCAAGCCACGAAACTCGAAATC
GATGCGAAAGGTTTTTGCAAGCTGGGATAGCTTCCATCCGACCTGCTGAAGGGCGTCGGTGTTGTCCGGCTGGGGCGGGC
CTATTCCAGTGAGGCGGAAGGAAGGAGGGCCGCCGGGGCGGAGGGCAAACGCTTGCATCAGGGCGGGCCACTGCATCCCC
TGCTTCATACCGAAATCAATGACGTGAACTCGGCGGAAGCCGGCGAAGGCTTCGAGAATGGCTTGGTTGGCGGTGAAATG
GGCGAACTTGAGGTATGGGCAGCTCTCAT
>c93049_g1
CTCAGAGAGCATGCTCTCAAGCCAGTTAGACAGATCGGACGGGTTGTAGTGCACGGTATCAGAGGCCAGGTGAGTGAGCA
ATGCATCGTCCTGCGCAGCGCTGCTCCCCATCGCCATCTCCAGCTGCTCTAGCTTCTGGGCCACGTCCGCCATATCCGAA
GACCTTACTTTGTAACCGAGCGCGGCAAGAAGCTCGTCCATGCCGGCATCAGTCTCCTCTTCCAACCCAACCATCTTCCC
TTTCCCCTTCGGCCCCAAACCGGGCGCCGCCTGTGCGTATCCCCCATTCCCCATTCCTCCGACGCTCTCCAGGTGTTCCT
TCTTCATAGCCGTGCCGTTTCGGGAAATGGATAGAGAAAGGAGAGGTAGAGGTTGCTGATAGGCGGCTCTGTTTTAGCTC
CCCAGAAGCTAAAGACGTGACTGTCTTGCCCGGCTCGTTCTCCAAAAACAACCCAAATTAGCCAACGAAGATAGCAGACT
CCCAGCTGAGAGTGAAGCTGATGAAGGGCGAAAACCTCCTCGTCCCCGCCGAAAAAGATTCAGAGAAGAGATCCGCACCG
GGAGCTAATCAGAAAGGGTGGCGGACAAGCAGAGATGAAAAGCAGGGAAAAAAGAAGAAGAAGAATAAGCTTTGTGCAGC
AACCATAAAATCAGGATTCTATTTTCCATTCCTCAGTTTCCTTTCCTTCCCCCTTCTTATATTTTCCATTCCCTCTCTTC
ATGTCCCCGGT
>c141550_g1
AACATACAAATGGGATAAGAAAAAATAAATAAATATATATACAACCTTAAAGGCATGAACTCTTCTTCGAAACAGCCATC
GTCTCCGACGAGCTTGGAAACAGGGACATGAAAAGCTTCTGACCAGGAGAAGTGATCAAGCGAAGTTGCACTGGGATTTC
CCCACCTATAAGACTCGCTGTTAAACATCTTCGATCCAACCTTGGTCTCGAATGGCGCATGAAACAGTCTCCTCTGCTCT
GTTCTAACATTTCTAAGCAGCTCATTGTTGATCCCATGGTTGACTACCTGAAAGAAGCCCCACTCTGAAG
>c93840_g1
AGAGGGAGAGAGAGGGAGAGAGAAGGAAAGAGAGTGAAACCCATGGAACAATACGGCTTGAATCAATGATACCCGGCTTT
TTTTATCCATATAAAGCTAAACAGTGATCTGATAAGATGCAACAGAACCTCTTTGTAGAAAAAAAAGGTTCAGTAAAAAG
TTGAGATTCCTTCTACTGTGCAGTAAGTAGTGGAGCTAGTGATGTGGCTGACAAATCAAATCAAACTTTATTACTCTTTT
ATCCGACAAACTAACTTTTCCCAACAACTTATGTTGATGAGCACAGCTGCGTGATGAAAGAGTATGTGGAGGCAATGAAG
GATCTAGCAAGCAAAATTCTGGAGCTGATAGAAGAAGGATTAGGGCTGGGGGGAAGTGGGGTACTTTACAAGCTTAACAG
CAAGAGTGATTCTCTTTTACGGCTAAACCACTACCCCTCACACAGCAGCAGTAGCAAATATAAAAAAGGCCATGAGAATA
AAAGCACATGGAGTAAGAGAAAAAGCGGGGAAAGTCGCAGGATTGGTTTTGGTGAGCATACAGACCCTCAGATCCTGACA
TTGCTTAGATCTAATGGCACTGGAGGTCTCCAAATACTTGCACCTGGTTCTCCAGTCTTGGGGAGTAGAAGGGTGTGGAT
TTCCGTCCAGCCAGATCCCACTGCTGTGTTCATCAACGTTGGAGACATCCTTCAGGCTATGACAAATGGAAGGCTGGTGA
GCGTGAGACACAGAGCAATGATCAGCTCCAGAAGGTCAAGGATGTCCATGGTCTATTTTGTGTCACCTGATCTTCATGCG
TGGATAACTCCTCTTCCAGGGATGGTCACAGCTGACAATCCACAACGATACAAATCATTCACCTGGGCTGAGTACAAGGA
GGCCATGTATTCATTGAAGCTTGGGCAGAATCGCCTTGACCGCTTGAAGTTATGAAGAATAAGAAGACGAAAGCTCTGAC
AATACTGATTGATCTACAAAATGAGAAAGAAGAGCAATCCCTTGTTCTAACGAACCTGATCCAAATGCATTGGCATTTCC
CCGCCTTAACCTACTCCGATTCCGGCGGAGCCAAATCATAAAACTATGAAGGGGAAAAGGGGACTAGGGGAGAGGGGCTG
GCGAACTCTCGACGTGAACTCGTAAAAAAAAAAAAAAAATACTAGTA
>c96842_g1
AAAAAAACACAAACAAAACACTAAATTAGAGTAAATTAAAAGTGCCAAGCACACTATTCTTTCATTATCATTTCCCAAAA
AAAAATCACATACTTACAGAAGACTCTTGCTTACCTTTCTTTGAGTTGAAACAAATGTTCCCTTCTGAAAGAAAGCTTAT
TCAATTTACTCTGGTTTTAGTCACTGTCAACTAATTCAGTAGTTCAAAGTATTTGGCCCAACACATGCTTAGATTAACGA
TGAGTTTGTTCATAGCTTTATGATCCTTGCCAGGCAATTATCCGTGGGTCTGGGGTGAGGCAAGTATCTTAATTGACACC
CGGGGTTTAACCGTTCAAGCTTGTAACCCAAGATAAAATAATGAAGGAAAACAGAGATCTCAAGCTTGGCAAGGTCATTT
CCAGGACACAATCTGCTTCCACCTCCAAAGGGAAGATAGGCTCCTGCCTTAGGTATAAGACCATGCCATCGAGATGGATT
GAATTTCTTAGGATCCTGGTAAACTTCAGAGTCCATGTGAACACTCCTATACCATACTTGAACTTTCCATCCTTCTGGTA
TTAAGTATCCATTAACATAAACATTAGTTGTTGCTTTCCGGAAAGCCACGAAGGAGATATTTACTACCCTTAGCGTCTCA
TCAATAACCTTTGAAAGATATTCCATTTTTCTGACATCCGTGAGTTTTAATCCATTTTGGGTAGGTAAAATGTTTCTTCT
AATTTCTTCCTGCTCTGCCTTGGCTTTTTCAAGACATTCAGGGTTTTCTTGCAGGAATGTGGTAGCCCACATGGTAATAT
GCCCAGAAGATTCATGACCAGCATTGAGGTACATAATCAATGTGTCAATGATTTCCTCATCATCCAGTCTCCTGCCATTT
TCATCCTTAGCTTCTATTAAGAAATCCATCATGTCCTTTGCTTTCTCAGAAGGCCCTTGGGCTCTTAACGACCTTCTATT
GTTGAGTGTGGATTTAAGTACTTCCACCAATCTCTTCCTAGCCTTCAAAGCCTTATGGTATGCAAACCCGGGAACATTAA
TTGCCATAGCTCTCATACCATAGTTGAGGTCAGTGTATACTTTTTCCAAAGACTCCATTACAGTGTCACCCTCCACGCTC
AGAAAAATATGCATAATAATCCTAAATGTAAATCTCCGAACCTCAGTAAGAAACTCGATCTGTCCCATCTCTGCCCACTT
CTCAAGGGTAGATAGAACAGTTTCTTCAATGAACATTAGGTATGTGGAAAGTGAATCATAACCATTGATGGGAGCAGATG
TTAATTTCCTTAGCCACTTGTGCTCTTCAGGAGATATTCCTATGAATGACTTTTTCCCAACAAGTTCAACAGCAGCCTTT
GGCCATCCAGTTACAAAGTGCTCATCATCCATCAATACTTGTTTGCAGGTTTCAGGTATGGTAACCAGAATTGTTGGGCT
TCCGAACATGAATGATTTGTATATCCCAGTTCGACCGTATCTGCGAACAAAAGAATCAATAAAGTAATCTGGAACACCGG
ACTTGAATGCTCGGAGAAACGCCCACATATTGCCGAGGAACGGCCATCCAAAATCCCCCGGCGGGAGCCGACGACGCTGG
TCCTCGTTCAGCTTTCTCTCGTGAGCCCACTCGTGCAACCACCTCGCCGCCCACCAAAGCCATGCCGCCACCGCGACGGC
CGCAGCCGCCGCAGCCATCCCCCACCAATCCCACTTAAAACCCCCCATACTCGTTGCTTACTTCGCCGTCGCTTCACTCT
TTGGAGAGCGACAAGCTACTTTTGAGAATAGTGAGCTTTCTGGAAGCGACATGGATG
>c99861_g1
GAGGGAGGACCGGAAGACAGGCACAGGACGGCGTTGTCGCATCTCCGCTGTCCATTTGCCCTGTCGATGAAGAAACAGCG
ACGGCGGGAGGCAGCGCCACCTGTCCTCCTCTGCCTTTAATTCTCATCTGCGTGCTCCGCCGGCCACCTCCCTCCGCCGA
TTCTAGGAATGTCTCGGCATTGGACGACAGAACCCGACGGCAGAAGAATCCAAAGCAAGAATTGGGTGAAGAATCATCTT
CCACTACGGCCACCACCTTCTTCTCCTCCGCACTCTCTGCCAGTGGCTGTAGGCCATGGTTGCGCGAGCTATGCGACAAA
AGGGAATGGAGGATTGGCGAGTTTAATTTGTAGCAACACGACAAGACAGAGGATGAGAGAGGATATTGATATGATTGCCT
GTCTGCAACTAATTCCTTTAACCTTCCAAAATCTCAATTTAATATATCCTAAAGGTAAAAATCGCTTTTACTAATGTGAA
ATCGCTGATAAACAGAGCATCTTTGTATAATTTTTAAGAAACATCACGCTCTGTTTGCTCTTATATAATTCTTCCCCCTT
CTCTCACTGACAACCGACTGTAAACTTTATTATTTTGAATCAAATTAAATTAGGACAGGAATAAGACTAGAAGGAACAAG
GCCACGATAGCAGTTTTGGCCTTTTCCCTTCTACTACGAATAGTAAGTAGAAAAGCAATTTTCAAGTTTGCTACCAAACC
GGTGGTGTGTGATCTTCTTCATCGTTAAGTCAATACTTGTATTCATTAATTATTGTATTCAGTCTTTTAGATGTTTGATC
ATACTTATTAACTACTCAGTTCACTGTTCACTCGGCCAAAAGATTGAAGCAGAGAAGATGGACGAAAAAAAAGGAAGAGT
AATATTAAACAAGAAGATAAAATATGGCAAAATTTAGGTATCAACGGTTTTCTGAATCCACTTGGAGAAAGCGTCCATGG
TGTTCATGTCTGCTCTGTAATGCTTCTGGGTGAACTCGAGCAGGGCTGACCATGTGAAGTCTGGATAGACCCTAGGGTTA
TTGGGGTCGACCAGCACGCCTGGCGGCTGTACCACCTTTTCCATCTCCGGGCTGAGAAAGAAAGCTAGCGACTTCCTCGC
CAGCTTGCTATTTACCACCGCGCGGTGGAGGCAGCTTTTGTACCTCCGGTTTGAGAGCGCCTGAAAATACAATAAAAGCA
TGCACCATGTTCAACAAACTATGTCCTATTTGGTATGAAGGAGTGGGAGTTGGAAAAGGATGCGCACTTGCCATGAAGGT
GTCGCCGATGTTGACGATAAAGGCATTGGTTTTGGGGCTGACGGAGCGCCAATGATCGTCGAAGAAAACCTGAA
>c95037_g1
GGAGGAGGCATTGGCTTTTCCATTGTTCTTCCCTCTCCCTCCTCTTTTAACCTTCCTCTCCTTCAACTTCCGCCACCGCC
TCCTCCTCCGCCTCCGCCTCCAAAGCTCTCTCTTTTCAAATCAATAACAGCTATGGTCTGCCGCTTCCCCAATACCAGCC
TGGAGGAGTCTCCTCCTCCGCCTCCGTCGCCATCACTGGAGTTCGACGCGGTGATTCTCAGTCGACAGCCGGAAATACCA
GCAGAGTTCATCTGGCCGGAAAACGAAAAGCCGACGCCGGACGCTTACGAGGAGCTCCCGGTTCCTCTCATCGACCTTTC
CAGCTTCCAATCCGGCGAGCCGGACGCGGTTGCCAAGGTGACGCTGCTCGTCGGCGAGGCCTGCGCGACCCACGGCTTCT
TCCAGGTCGTGAACCACGGCATCCCGACGAAACTGCTCACCGAAGCCCACCGCTCCGTCGAGTCCTTCTTCTCCATGCCG
CTCCGGGAGAAGCAGAGGGCGCAGAGAAAACCCGGCGAGAGCTGCGGCTACGCTAGCAGCTTCACCGGCCGGTTCTCCTC
CAAGCTTCCGTGGAAGGAAACTCTTTCCTTCCGCTTCTCCCCGTCCTCCACCGTCGTCCTCGACTACTTCCTCCGTGCTC
TCGGAGTGGAGTTCCGCCATTTTGGGGAAGTGTATCAGGATTACTGTGAGGCAATGAGCAAGTTGTCGTTGGAGATAATG
GAGGTCCTCGGCATGAGTCTTGGCGTCGACCGCTCCCACTACCGCGACTTCTTCCATGGCAATGACTCCATAATGAGGCT
CAACTACTACCCTCCATGCCAGAAGCCAGACCTCACGTTGGGAACAGGGCCTCACTGCGACCCCACCTCCCTTACCATCC
TCCACCAGGACGACGTCGGCGGTCTCCAGGTCTTCACCGACGAGCGGTGGCGCACCATCATCCCCAAAGCTGACGCCTTC
GTCGTCAACATCGGCGATACTTTCATGGCACTGTCGAACGGGAGATACAAAAGCTGCCTCCACAGGGCGGTGGTGAACAG
GGAGGTGCCGAGAAAGTCGCTGGCTTTCTTCCTCTGTCCGGAGATGGAAAAGGTGGTCCGGCCGCCGGGCGGCTTGGTCG
ATCCGGACCACCCGCGCGCCTACCCCGACTTCACGTGGTCGGCTTTGCTCGAGTTTACGCAGAAGCATTACAGAGCCGAC
ATTAAAACGCTCGACGCCTTCTCCCAGTGGATTCAGGGCCCTCTCGCCGCCTGATCTCCCCGGCCTCTTCCCTCTTCTCA
ACTCCCCAGCCCTTCCGGATTTTGTTAATTAATTCATTCCCCCTTGTTCTTTTTGCCACATACGCTTCTTCTTCTTCTTC
TTTCTTCT
>c42659_g1
TGGCTTCGACCACGGTCGCCCCCGCGCGGAATCAAGCTGGAGAAGAAATTGATTTCTGCAAGACATGCCATCATCATTGC
TTTGCCCCCCTCCACTTCCTTGCCACCTTCCCCTCTTTGTACTTTTTCCCTTCTATCTCTTCCCATAGAAGCATCCCGGC
TCCTCGCATGGCCGCCTCGCCGCGAACCCCTCGGCACCCGCCTGCCTTCCGCGCTCCGCCGCCATCGCCGGTAGCCGGGC
ATCGCAATATCTCGCCGCTAATATCTAGGGACGATGAATTCTCCACATTCCTCAAACGATCCCGCCGCGTTCCGGAGCTG
ATCTTGCCGCATCGGCTCTTCCGGCGAGAAACCGCGCCGTGGAGCCCTCCGGAGATCGATTTGCAGTCTCTGATGTCGAC
GGAAAATGGAGGATCGGAAGAGAAGGCTATTCGGTCGGCGGCGAGG
>c100955_g1
TGGAAAAAAACATGAAACTATTTACTACCAAATATAGTAACAGATAAAAAAGTATGCTGCAGAGGCAGCCTGTTTTGACC
AAATAAGCATTCCAAAACAGGAAAGTTCATAAAAAACTCATCTTTTTTTTTCTTAGTCATAGTCTCATAGATGATGAGAA
GCAGTCTACATCTCCTCTGCACGCTTTCACTGATGCTTCTCGAAGCGGCGCAGCCGGTTATCGGCGAGCCTGGATTTAAA
GGCGGCGGCTTTGTAGTCGGCCCACGTGAATTCGGCGTACCTGCTCTGTTCCTGTTCTCCGAGGAGCTGCGGCATCGGCG
CGATTCTCGCTGCCGGCGGCGGCCCTCCGAAATAGATCATCGACAACCTCGTCCGGTCGCCGCTCGTCACCACCCTGTGC
CTCACGCTCCGGAATCTCCCGTTCGTCAGCACCTGAAGAGAATCCCCTACATTGACGAAGAAGGAGTCCTGATCTGGGGG
GACGAAGACCCAGCTTCCGTCTTTCAGAGAAATCTGGAGCCCTTCCGAGTTGTTCGACCGCAGAACCGAGATGATCTGAG
GATCCGTGTGCTCCCCAAAACCATTGACGCTCTGGTTGCCGAATCCCCGCAGCATCGGGCATGGCGGGTAGTTGTTCAGC
CGGAATAACGAATCGCTCTTCTCGTCATTCACGAGCTTGCTGAACGCATTCCTCTGCTCCATTCCCAGCCCATCCGCCAT
TAATTCCAGCACACCGGTCGCCAGCTTCCTCACGGCAGAAATATACTCAATCAAAGCAGAGCTGCATGAATCCATACAAG
TCAGGAAAGCTCCATTAGAGTTCATAATTTGCTTGAAGTTGATATACCAAAATGAGGTCATCAATGGCTCCTTTAGGAAG
GGAAGAGAGACGGCAGGCCTCGAGGTGACCTCGAGAAGCAGATACTCCAGCCAGCCGACATCGCCATTGCCGCCAATCTT
CTTGTTTCCATAGCCGAAGGGGTTGGCGAGGACGGCCTTCTCCTTCTCGAACTCCGGCAGGGCGAAGAACTCCATGGCGG
CTGCCTCCAGCTTAGAAATCAGGCCGCTGGGTATGCCGTGGTTGGTGACTTTGAAGAAGCCAAATTCGCTGCAGGCAGCG
ACAATGTCAGCGGCGGCGGTCGGCGCGGAGAGGTCGATGGTCGGCATGTCGGAGAAGGAGGGGCAGGGCTTGGAAGGTTT
GAGGAGGAATATGTCCTCCATGGATGGGTTGGCGAGGACCACCATGGCTGCCGGTTGCAGGGGAGAAGGAAGGCAAAGGG
GTGGAGGGAAGAAGGATAGAGGGAGTCTGCAGGAAAC
>c106822_g1
GGGAATCCTTACCCCAACCTCCCCGATCTCCTGCCCAATCCGCCATGGTAGTAATCACAAAACCCTCCGCCCTCGACCAG
CTTCCCATTCCAAAGCTCCACCACCCCGCCGCCGTATGCTTCGCCGCATCCATCCCTGTCATCGACCTCTCATCCCCCAC
CGCCCCGGCCCAGCTCGTTTCCGCCTGTGAGGAGCTCGGCTTCTTCAAACTCACCAACCATGGAATCTCCCCCCAGCTCA
TGGCCACCCTCGAGGCAGATGCCATAAAGTTCTTCTCCCTTCCTCTTTGGAAGAAGGAAGAGGCCGGCGCCTGCGCCGGC
GGCCCGTTCGGATACGGCAGCCGCTGTATCGGCCACAGCGGAGACGTCGGCTGGATCGAGTATCTTCTTCTCCAAACAAA
CTCCATTAACCCCTCTCTCTCCAGCTCTCTCCGCTCTGCTCTGAACGAGTACACGTCGGCCATCAAAAAGCTAGCTTGCG
ACCTTCTCGAGCTCATGGCGGAGGGCCTCGGTCTCCGGCCAAGGAACACGTTGAGCAAGCTCTTAATGGATGAAGAGAGC
GACCTTCTTCTCCGGCTCAACCACTACCCGCCATGCCCAGCTTCTCGCGACCTCGCCGCCGGCGTCACCGGCTTCGGCGA
GCACACGGATCCGCAGCTAATCTCCATTCTCCGATCCAACAACACTTCCGGCCTCCAGATTTCGCCCGGCGACGGGAGAT
GGGTCCCCGTCCCGCCCGACCAGAGCTCCTTCTTCGTAAATGTCGGCGATTCCTTGCAGGTTCTGACGAACGGGCGGTTC
AGAAGCGTGAAGCACCGGGTGTTGGCGAACGGCCTGCAGTCCAGGGTGTCGGTGATCTTCTTCGGCGGGCCGCCGTTAAG
GGAGAGGGTGGCGCCGCTGCCTCTCCTGATGGAGGACGGCGAAGAGAGCCACTATCGGGAGTTCACGTGGTGCGAGTACA
AGGCGACGGCGTACAAATCGAAGCTCGTCGACGATCGGCTAGGGTTCTTCGAGAAGCGCTGAGGCGCTGCAATTAAAATT
GCAATTTTTAACAATTTATTACATGGAAACAGGAAGAAGAGGGGAGAGTGATAAGTTGAGAATTTGTGCCTCTTTTTTTA
TTATTATTTAATCAATTTATTTGGCATTTTTCTCTTTTTTTAATTATTTTTCCATCTAACAAAGTTGTGCATTTTGG
>c99070_g1
GCAACACAATCCTTAAGCAATTTTATTACTTCAATAAGGACTAAGTACAGAAATTCTTGTCAAAGAAAAAAATGAAATAA
GAGAAGAAGGAAAAAAAAATCATATCAATAGCCATATAAAAAAATCAACTTATCTTCTACAAACAATAGATATGAGCTCA
CAATATTCCATATATCTATTCTAAATTAGATATAAAATGAATGCTACATGAACTAATCACTCCTTTTCCCTTAGCCTATC
TGCCCACATTCAGCAAAATTTGGCGGCTGAATTTAGAGAACGACTGAAGTCAGCAACTACTCTGAAATTATGTCCTCCTC
TTCTATGCTTAATGCTCCTGAATCCTAAAATCAACTTTATAATTCTATGTTCTCCTTCTTGTAATCCAATTGAAAGAGCT
CTAGCCGATTCGAAGTGAGTCTGAGCGAGTACATTATCTTCTTGTACTCAGCCCAAGTGAAGGGCCTGTATTTCTGGGGT
CTCTCAGATGTGACCATCTCAGGCAAGGGGGAGATACATGTATGAAGTGATGGTGCTGCAAAGAACATTGTTGAGAGCCT
TGATCTTCTGGAATTGGCAATGGCTCTGTGTCTCACACTCACACACCTTCCATTTGTCATTGCCTGAAGTGCATCGCCAA
CGTTGATGAAGAACGCAGAAGGATCCGATTTAACCGGTATCCAAACCCTTTCATTTGAGGCTGGCTGTATCTGCAAGCCT
TCTACATCGTTCGATCGGAGGATCGTCAAGATCTGAGGGTCGGAATGCTCCCCGAACCCGATCCTAGAATCCTTTTCATC
CTTGTTTTTTGCAGGGCTACCATAGTAGGGAGGGTAGTGGTTTAACCTCACAAGAGAGTCACTTTCCCCATCCCTTATAA
GCTTGCTGAAGGCCCTCTCATCCTCAAGCTCCAGCCCTTCTCCCAATATATCAAGAACTTCACATGCCAGCTCCCTTACA
GCCTCCACATAAGTGGTCACCACACTACTGAAGTTTTTGGGGTCCTCCTTGTTAATGGCCCTCACTCTCTGGTAGATGGA
AGAAGGATTTGTGTGGAAGAGAAGGTACTCGAGCTCGCCGGTATCACCATTGAATCCAATCTTCTTGCTGCCGTATCCAA
TAGGATTTGGGGGACCGACCTTCTGTTTTTCAGACGCAGGCAATGAGAAGAACTCCTTGCTTTCCTTCTCAACATTGTCA
ATGATTTCCTTGGCCACGCCATGATTGATCAACTTGAAAAAGCCGAATTCCTCACAAGCTCTCACAATGAGCTTCCTCAC
TCTCTCCCTTTTCCAGGAAAGGTCTATCACTGGCAAATCAAGATGAAGGAACCGCTCCTTGCTCTCTGGCATGGTCAAAG
TAGCAACCACCATGGCTTTTGCTTGGCTGTGTCTGAGCTAATGCAGAAA
>c93419_g1
GTCGGACATGGCGGATGTGGCGCAAAAGCTGGAACAGTTAGACATGGCGATGGGCAGCAGCAGTGCTCAAGATGATGCTT
TGCTTTCCCAGCTCGCAACTGATACTGTTCACTACAATCCATCTGATCTGTCGAACTGGCTGGAGAACATGCTCTCCGAG
CTCAATGCGCCTCCTATCCCGCTGTTGCCGGCGCCGCCGCCGCATCCAATTCCGATCAGCTCTGATTTCCTTGCCGGAAA
TATGTCTGCCCCCTTTCACGAACCCGGCGACCCTGATTACTACCTCCCCCGCCGTGCCTTATGCGGACCAGAGCCCCAGG
TAGACTGTGGGTCGAGAAATCGGAAGCGGATGAAAGCCTCCTCTCCATCAACATTTTCGTCTAGAACTCCGGCACCAGCC
GCCGGATCGACGACACCTGCCACCACCGTAGGCGGAGAGGTTTCCTCCGTTCATCCTTTGGTGATGCTAGACACGCAGGA
GGCTGGGATTCGCTTAGTCCATGCCCTGCTTGCTTGCGCTGAAGCGGTGCACGAAGAGAATTACAAAGCTGCCGACGCCA
TTCTGAAGCAGATATCAGTTCTCGCCTCTTCCCAAGGCGGCGCTATGCGCAAGGTCGCCGGCTATTTCGCCGAAGCCCTA
GCCCGCCGGATCTACCGTATCAACCCCCACCAAGACGCTTCCCTCGACTCCGCTTTCTCCGACATCCTTGAGATGCACTT
CTACGAGAGCTGCCCCTACCTAAAGTTCGCCCACTTCACCGCAAACCAGGCCATTCTCGAGGCCTTCTCCGGCTGCCGCC
GCGTTCACGTCA
>c12103_g1
CGAGGGTGGATACGAAGTAGTCGGCGACCATGGAATGCGAGGCGGGAGCAGCGCCGTTGTATCCGAAAGAGAGAGTCTCC
TTCCACGGAAGCTTGCTGGTGAAGCGGTCGGAGTGAGCTCCGGCATAGCCCCAGTTATGAGTGTGGCGATTCCTGCAGGC
CTTAAGCTTGGTGGCGAGAGGAAGCTTGAAGAATTCGTCAATGCAAACCATGGCGTCTCGCATTAGGGAAGAGTCCACGC
CGTGGTTTATCACTTGGAACAAGCCGTGCTCCATGCACGCCGGACGGACAAGTTCGATGGAGAGCTGCGCTGGCGAGTGG
CCGTCGCCTCCGTGCAAGAAGCCGTGGAGGTCGATGACTGGGGCATGGAGCTCGTGAGCTGCGCTGCACCGGCCAGACTG
TGTCCAAATGAACTGGGGAGGAATGAAAGGTTGGTTGAGAAGGAGGGGGGAGTTGAAGGAGACGATGCTGCCGCTGCTGC
CGCCTGCGTTCTGGTCTTTTTCTCCGGCGCTGTGCATGTCGAGTTCTTCCATGGGAGGAAGAAGGAGAGGGCTTCGAGGG
AGCCGTTTCGGTTCGG
>c94752_g1
GCGACTCAAAAGCAGCGGCGACGCCATGGGAGAAGCCGAGGCAGTGAAGGTGGATCACGATAAGCCCTGCGGGTATAACA
TAAACGACAACGCCGACCTGCTGGCCGAGATCCTCGCCCGCCTCGACGGCCGCTCCCTCGCCGCCGCCGCCTGCGTCTGC
CGCCTCTGGCTCGCGGTTTCCGGCAGGGACGCCGTGTGGGAGGCTCTCTGCAACCGCCACGTGCACGCTGCCACCTCCTT
CCCCGGCACCCGTTCCGTTGTGGCAGCCCTCGGTGGATACCGCCGGCTCTACCGCCGCTGCATAGGCCCCATTCTTGACC
GCCTCGCCGCTGCCGGAGACCATGCGCCCTGCCCATCGTCGTCGGCGTCGGCGACTGCGGCGCAGCGGCTTTCTCTGTCG
CTCTTCTCAATAGATTGCTACGAGCGGCTGAGCCCCGGTGGCCGGCAGCGGCCGTCGTCTTTGCTCTTCCTCGGGAGTCC
CGTGGATGTATCCTGAAGAGATGGGATGACCAGATGCTGACCGCACAGCTGCGGATGTTTTGCTGTAGTATCGCCATGAA
TCTTAAATCCTTACGAAAAGAAGAAGCGATTTTTTTTCTTCAGATTTTTGTGCTCTTTAATTATCAATCTTTCAAATT
>c106997_g2
TTTTGATGATGGTTTCATATGAAGGGCACAACTGAAAGGCAGCAGAGAACCTCTCAATCTTTGGATTAGCCATCACTCTA
TGCTCAACACTCTTGTAAACACCATTACTCCATGCCTGCAATAAGTTATATTAATTGTTTCAGAATAATTTTTGATCTCC
TCAAGAGTATTAATTTTCTAAAAAAATATGTTTATTAACAAAATGAGTTAGTTTAATTGCTCTCTGATATGACATGAATC
AAATACTTTTTAGGTCTGAATCTTTTTATTCATGAATACATTTTAGGTTGTATTAATCTAAGTTGAATTTGATCTTTTGT
TTTTTTATACCATATTTTTGTATGGAATCAATATATATGTCTACAACTAGGGGTGTGCAAAAAGAAC
>c121559_g1
GCGTGAGCAGATTTCTCACTGGTTCGCATTCTTCTTCTCGGCGGAAACTGGAAATCGCGATTATAAGGCATTTCGGTCGC
CGGCGAGGTTGCTGGGCTGCTTCCAGGTCGTGAACCACGGGATTGAGGAGGGGGTGGTTTTAGCGGCGCTTGAAGCTGCA
GAGGAAGTGTTCCGGCTGCATCCGGAGTGGAAAAAGGGAGCTGCGAGATCACCGGAGAGAAGGTGGGGATTCGAAGAGGA
GGACGGAGAGGGTTTGGGGGAAGGTGACGAGTTCTTCTGGTGGAGCGGCGCAGTAGAGGAGATGGCGGGAGTTTTAGAAC
AAA
>c112848_g1
CAGCTGGATCGAAAAAAGTAGATGACGAGTGGCCGGACATCTGAGCATGCGGCAAGTCATAGCAGCCGGAACTGGGATGC
ATCGCCAGTGGCAGCGGCGTGGGCGGACCTCCAAGCTCAGAGAGCATGCTCTCAAGCCAATTCGATAAATCAGACGGATT
ATAGTGCACGGTATCGGCAGCGAGGTGTGTCAGCAGCGCATCATCTTGCGCCGCGCTTCCCCCCATCGCCATCTCCAGCT
GCTCCAGTTTCTGCGCCACATCCGCCATGTCCGACGACCTCACCTTATATCCCAACGCAGCAAGAAGCTCGTCCATGCCA
GCGTCCGTCTCCTCGTCAAATCCCATCATCTTCCCCTTTTCCGCCGCCATCGCCATCCTCGTCGGCGCCGCAGCACTTCC
CAAAACCCCTCCACCGCCAACGCTGTCCTGGTGCTCCCTCTTCATCGCCCCGCCGTTCCGAAAGACGGAAGAATCAATAT
CGGCCAAGCTCGGCTTCGCAAGGGCGAAGTCGTGATGATCCCTGCAACCAGATCGGCCTCCGATACACCCGAAAAAGGCA
GCTAGATATGAAATACAGGAAGCTCAGAAGCGGAGCGGGGACGAAAGGAGGAGAGAATAGCAGGCGATAACTCGGGGAAA
GGCTGAGAGCTTCACAGAATAGAAGAAGCGGAGGTGAAAAGGAAGGGGAGGTATAGGCTTGGCCCTCAATAAAAGGGGAC
AAAAATCCTATTTAAT
>c106348_g1
CAAACATCAATTTTACAGGTTTCTTCCCCAGAACATGGAGATATCAAGTTTCTTATTTATATATCAGATTCCAACATTTA
AAAAACAAGAAACAATTCAGATCCCCCATAACAAGTGAGATGATGAATTCAGATGAAGGCTCATTAAACCAACAGAGCTG
TTCTATAGAAGTAGAGAGTGATAGAATATGAACCAAGTCAGATCTGTAATTAGCAAGTTATAACAACAACAACAATAACA
TAGACAACAGCTGGGCATCTAATCCCTCTCCGAAAAATCTTTCTACAGGGAGCAAGAATAAAACACCATGAGTAAAAACT
ACAGTCAGACACCAAGGATGAACAAAGGCAGTGGCTTCTTCACTGTCATGTAAGAAGCATCTTCCAGTTCTCCATGTTAT
TGTATGTGATCAATCGATAATTCTGCAGCTAGCAATTAGACTTGACAAAGTCTCTGATCTCCTCCATAACCTCATGATAG
TGGTGGGTATTCGGTAGGAAGTAGAAGCCGATTGTAGCCTTCTCTCGATAAATAAGACGAACCTCATGGCCGGCCTCCTT
GAGGCCTTCGGCATAGCCGAGCTGCCATTCCTGAGTTGGGTCTAGGCTTGCCACCACAAGAAGGGTCCTCGGGAATGGAA
GCCCCTCTAGCTTGGGGCCATTGGGGCCAAATGGGTTGCAAGCTGGGTGATCACGGTCAGCTCCTTCGGGGAGAAAGGCC
TTCCAGTACCAATCTCGTTCCTTCAACACAACAAAGTACTTTCCATCCAATTTTAGCTCGGATTCAGTTCTTTGATTGCC
GCCAAACAACGGGTTCACCAAGATGTTTCCTGAGATGTGGATGCCAGCTTCAACAGCTCTAACTGCAACATGATGAGCAA
TGTTCCCCCCTGAGCTATCACCGGCAAGGAAAACACGAAGCTTGGAATCATTGCCGCTGCGGAGCCAAGGCTCCGAGGAA
GCCCATTTCAATGCAGCCCAGCCATCATCGTAGGCACAGGGGTAGCGGAACTCGGGCGATCTTCGGTAATTAACGGAGAT
AACCACTGCACCACCACAGAGAGTGACGAAGCGGCGACAAAGAGTGTCGTAGATTGCACTGTTTGATGAGGAGTGGGCGA
AACTGCCTCCATGGAAGAAAATGATCACCGGGAAGGGGTTTGGTGATGGCGGATGCTGGAGCTCAGAAAGGAGGGCTCTT
TGGGGGAGTTCATCATCTGCCACAGCAGGGGCTGGGAGGTAGACTCTGGCAAGAAGGTGAGATAGCCGGTCAAGGATGAC
GTCAAAGGACACAACACCATTGGTGGGTGAGGCATTAGCGGGGACTTTTCGATCAAAAAATTCTGCCAGGTGACGATCAA
AACTGCCATCAGGCCGCCGGAGCATGGTGTAGGTGACCTTAAAGTTGGAGATCAGAACCCATGTGTTGAGGGGAACCACC
GTCTGCGAAGAAATGAAATCAGCCATGTGTTGTTTCAGATTAGTGACTGGATTATGGTAGAATAAGAGACCCCCTTTTTC
TCTGGATTGCAGGAGATGCGATCGAAAGATATTGAAAATTATAACCTAAATGGGCGTTTTAATGAGAAGAAACCCAAATT
AAAGCCAGGTTTCGATTTCATGAGAAGCAGATGTTGTTCTTCTCCGGGATCATTTTCCAGTAAAACTGCAATTTTTGTAC
GAAACCTAGAATTCAAAAGTGGTTCGAAATCAAATTGAGCGGGACTAGCGACTACACCAGATTCACAGAGCAGTAAGAAA
ATCCAGAAAGAGCTAATAATCGAGAAAAGATAGCAAAACCTAGAAACCTTAATACAGTTAAATCTGAAAAGTTACCGGCA
CGATCTACTCATTAGTTAAGCAAAGACAGGTTAGAACTTGGAAATAAGCATACCGGGGTCCATTAATGATAAAGGAAATA
ACAGTGTAATTACCTTGGACTCGTTCGCGTTAACCTCGTTGCTGCCGGCCATGGAGAGACGCTTCTAGCTCCCTTACCGA
TGTATGTATCTTCCCAATCTATACACTTATCAATCTATTCCTTTCAGAAGTAAAGGACGAAGCAGTGGTTGAGGAGAAGG
CAGATGAGGCTGGGAAGTTGGAACCCTAGAAAGCTCCCGCCTTTTTTATGATCCGTCTCGAGGCCAAAGCTGAATCGAAC
AATTTCAAGCCCCCCTATGCGAAACCGCGGCTCTTCGCCGGCCACCGACCAGTTTCAGGAAAGAAGCGAGAGATTTTGAT
GCAATTCAGGAAAGAGAAAAGGAGAAAGACGAGAAAGCTGAAGCGGTGAGAGCGAATCATGCGAAGGCGAGCGAGTCAAA
GTGGACGAGGACAGAGAAGAAGAAGGAGAGAGAGAGAGAGA
>c100303_g1
CTCAAATTTCTTAAAATCACATGTCTTTTATGTGAACCATGAACCTAAATGGTGCCACCAAGAAATATGCTCAAAACAAA
TACAAAGAACGACACGAAAATGGTGGGCCCATTCATGTTTTAATGCAATTGGTATCAAGTTTCATGGCGGGCCACACTCT
CTTGATGTGCTTGCAGTCGAGTTCCTTCTCAACTCTCAAGAGGATCCGAACCAATTGCAACTGTCACGTGCCGGGCAGCT
GCGCCCGCGTGAGATATCCGAGGGCTTTTTCGTCATCGCAGCCCATAAGAGAACAAAAGGCGAAACGAGTGCCCAATTAC
TTCAATCTACCTAAATTAACCCTTCCTTTGTCGCAAGAGATGCCGAAACCTGTGCGGGCATTCCCGTAATTAAATTCTTT
CCCGATGGCCTTTTCTAAACAAAGTGGTTAAAAAGATAGTGTGCCATCGTCTTCTTCGCTTCAGGACCAATCGGAAAACT
GAGAAGTTGAAAGGGGCGGAGACGGAGAGAGCGGGAGAATCGGAGAAGGGTTTCAATCAGGATTGGTTGATGAAGCGGCG
ATCGGTCGGCGGCGGATCGGAGGGAGGAGATCCTCCGGAGATCGAGGAGAAGAGGGCGAAGGTCAGCGGCTTCGGTCAGG
AGGAAGCGCAAACGGTCCCTTCGTCGTCGGGGGAATACGCGGCGGCGGCGGAGCCGGAGCTGGGAGAGGATCTGGTGTTC
GAGATACTGAAGAGGGCTGACGCTAGGACGCTGGCGCTGTCTGCGTGCGTTAGCCGGCGATGGCGGGTATTGGCGGAGGA
CGAGCGGCTCTGGGAGGCGGTTTGCACGCGCCACTGGGCCAACATCGGCTGCGGGAACCAGCAACTTCGGTCAGTAGTTC
TTGCCCTCGGAGGATTCCGCCGGCTCCACTCACTCTACCTTCTCCCTCTCCTCCGACCATCCTCCGCCGCCGGCCGCCCC
AGGCCGTCGCTTCCTCTCTCCGTTCTCTCCGCATCTCGCCGCCCGTCAGGCCTGCCCGCCCGCTGGGGCAAGGATGAGGT
ACAGCTCTCTCTCTCGCTCCTTTCCATCGGCTACTTTGAGAAGATGAACCTCAATTACCCCCGTCCTGGCGGCGGCAATT
CCGGCGGGGCAGCCGGTGCCGGCGGAAAGCCGATTTGATCCAGTCACCTCTTTAATCTCACCGCCCAAATTCAACTCTTT
TATTCGATGTATAATTACGCAAAGGGTAAGCTTTTGTTTTATGCACTCGACTTTAATATAATTTCCATTTTATTGGTTTT
TTTTCTGCAAT
>c109593_g1
TCTCATTTTGTCTTCAATCGGTGATACTCCAACTTTTTAAAAAATAAAATAAATTAAAATATAATTAATTTAACTACTAA
AAAATAAATTAAGAAAAATAATAAAAAAATAAATTAAAATGACTAATAAAATGTATCGATTGGCATGAAAAGTCTTGTTG
AAAATCCAAGGCTTTTGTTTGTGATTTCATACCAATAAATATAGCACTATTTATAAGAGGTCAATGTTGTAACATATTGT
TCAAAAATGATGTGGACTAAATGCTTGATAGCAAATAGTACAAAAAAAAAAATCATCAATTAAATAAAAAATGACCAAAC
AGCTCGGTTCAGGCTGGCCAAAATTTTGGCTATAATTAATTAACCTATGCTCATTCACAGTAATGGGCTTGGGCCAGCCT
AGCTGAGAAGGAGAGAGGGTAGGTTAAATTCCACCCTCCACCAACCTTCATCTATATAAATAAGCAATCATAGTTTCTGT
TTTAAGATGTGATACCAAAGTCCTCACAAAAAGCAGTGCCCCCTACCAATAGAGGTGTTGGGAGCGGGTGTTGGGAGCCT
CTTTTCGTTCCAGCTAAGCACTGAGCTGAACCGAAAATGTTCCTTTTGGAAAGAAAAATTGAAAACAACTCATTTTGCTA
CTTTTGAATTTATTTATGTTTCATTAAGAAATTTGTCCAACTATGAATTGGTCACCAGGATTTGTCCTAAACATGCTAAA
GTTTTGGTCTCAGCATGAATTACAATCATCTGGATATTTAGACCAAATCCATGGACTAAACTAGTGAAACTATGAAAGAA
ACTCAGTAATTTATTGCAATAAATGTCAAAACAACCACCTTGATTATTAAGGAGTTCAATCAACTTTTTGAAATTATTTA
CTTTAAAATCTAAGTTGAAATTGGAAGATTTCTAAATTTACATAAACTCGCTTGGTAAAACCAAAACCAACTTTTGGAAA
CTTGTTTTCAAATAACCAAATATTTAATTTGAAAAATATAACTAATAGAAATGGTAGTAATACTAGCTTGCACTGTTTCT
CTTTTGTTTGGTTAAAGATTAAACAGCCTGGAAGACCTTGAAAATCATTGATTGTGGTAGTAATTTAGGCCAATGCCCTA
TAGTTGAACTATGTAATCTTCTTTGTCTATGTTATCAACCATGTTTATATTTGTTCCCCTTATTTACTAAGTGTGGCCGA
GAAAAGTTCTGCTGGAGCCAAAGCTTACCTTGCATTTGTTGCCGAAGGACTATGTGGAATGCAAGATTGGCAAGTAGTCA
TGAGTTTTCAAAGAAAAAATGGATCACTCTTTAATTCCCCCTCAACAACTGCTGCTGCACTTTGTCATCTTCGTGATAAT
AAATCCCTTAATTACTTGAGTTCAGTTTTACAGAAGTTTGGCTGCTCAGTACCTACAACCTACCCACTGGACATATATAC
TCATCTTTCCATAGTCGATAAACTTGAGAGACTGGGGGTTTATATGCATTTTGTTCATGATATAAGAAGAATCCTGGACA
GAGTTTATAGATGTTGGGTGGAGAATGATGAGGAAGTTTATTCAAACATAGCAACGCACGCCATGGCTTTTCGAATTTTG
CGTATGCATGGATATGATGTCTTTTCTGATTCTTTATCTCCACTAGCTGATGAGAGGCATTTTAAGGATACAGTCCAGGG
ACATATTAGAGATCTGAATTCTGCTATTGAGCTATGTAAGGCTTCACAGTATCGTATCTCATCAGACGAACCAGTTCTGA
AAAAATTAAGTTTGTGGGTGACTCGTTTTCTCAAGGAAGAACTGAGTAACAATGCCAACAAGTCATTTGATATTTCACAA
GAGATTGATTATACTCTCAGGTTCCCCTTTTACGCTAACCTGGATAGGCTGGAGCACAAAAGAGATATCGAACACTACAA
ATTAGATAATTTGCAGATGCTTAAGACATCATATATGTCCTCTAGTATCAATAGTAAAGATCTTTTGGAGCTTGCTGTGG
ATTCCTTCAGTACTTCCCAGTTGATATATAAGAAAGAACTTCTGTATCTCGAGAGTTGGGTTAAAGAGAGCAAGTTGGAT
CAGCTTGGATTTTCTCGGCAGAAGCAAACATATTCTTATCTCTCTGCCGCTGCAACAATTTTCTCCTCTGAACTATCAAA
TGCTCGCTTATGTTGGGCCAAAGGTGGCGTGCTAACTACTATTGTAGATGATTTTTTTGATGGTGGAGGTTCCTCTGAAG
AACTCACCAATCTCATTTTACTTGTGAAGAAGTGGCATGGGGTTCATGAAAAAGACTTCAGCTCTGAAAATGTGAGGATC
ATATTTCTTGCTCTTTACAATACTGTCAATGAGCTCGGAGTAAAGGCTTCTCTGTTCCAAAAGCGTGATGTAACTAACCA
TATCATTAATATTTGGCAAGCCATGATTAACTCCATGATTAAAGAGGCAGAATTGTTAAAAGATAATACAGTACCTACAA
TGGATGAATACATGGCTCATGCAATTCCATCATTTGCTCTAGGACCCATTATTCTACCTTCTCTCTATTTTGTTGAACCG
GAGCTTTCTGAGAACATCATCGCGTCTACCGAATACTGCAATTTATTAAGACTTGTCAACAAATTGGGTCGTCTCTTCAA
TGATACACAAGGCTTTGAGAGAGACACGAGAGAAGGGAAACTCAACTGCTTGTCACTGCTTGTTCTCCATGGCAACGGGT
CTATTTCTGAAGAAGAGGCTAGGAGAGAGATGGTGCACATGATAGAATCCACAAGGGCTGAACTGCTTGGGTTGGTTCTC
CAGAAAAAGGGAAGCATGGTTCCTGGATCATGCAAAGATCTATTCTGGAAGATGAGCAAAATTTTGCATCTTTTTTATAG
AAACACTGATGGGTTCACTTCACCAAAGGAAATGGTCGGTGCCGTAAATGCAGTGATTCATGAGCCTCTTAAGGTAAGCC
ACCACGTCCTTTCTAATGCTTAAGTAATGCAGAACGCGCTCGGGAGATCCGAAGTCGGGAACCCCCGACGAGTATCATAT
CTATTTTACTTTTTTTTAGTCTTTATTTCGCATTAAGAGTCGCACCTATGTGCGCAATATTTTATTTGAGTATTTTAGTT
ATTTTATTTTGTGATTTTGAGTACAATTCATGTGGATTGTCCGATTAAATCTAATTTGATCGAATGAATGTCATTTCTTG
AGGTCTAGGGTTTGTCTATTTAAACCCCCATTGTAGCTTCATTTTGTTTTAGCTTTGGAATGAAATCAAATTATTTGGGC
TCTTTCCCGATCCCAAGCTCCCTGCTTTCCCGAGTGCGAGATTCACGCAGCCAGCGCCTCCAGCCCATATCTTAGCTCTT
GCTTCTGCTCCTCGGCGCTAGAGGCTTCTTCCCCGCAGCGTCCAGGTGGGCGACGCGAACTCCAGCTTCGGCCTAGCATT
TCTTTTTCGACATTTGCGGCAACTTCAAACAGGAACCCTATCCCCTTGCCCAGATATGTCGGCTCTCTAAGGATCTTGAT
CTCTTGCTCAGACCCAACTCTCTCAGATGCTCACAACCCCACCCTCATGCGGATCAATGACCTGATAACTGAATGCCTCT
TCACTAGTTACTGCCCTCTTTGAGCCCTAACTGAGTCAAGTTTGCTGTCTTGCTGCTCTTATCCAATGCAGAGGAAGGTT
CTATGACATCTAGGGTATTGTCTACTCCCTTCTTTTCTCAGAAAATGTCCCTGCTGCTATGCCCTAGCTTAGAAGTTATT
TGCTTAAACTCTTGTTGAGAACTGTTTAATCTTATTCTTGCTAGCTACTCCAGGTTCCTGTATTCTACTTGAGTTCCACT
ACTGCCTAAATGTTTTATTTCAGGTTCCCTATCCTATAAGATTGTTGTTATATGACATTGAATTTGTTCAGCTTGGAATC
ATTCTCCTACTTCAAGTGTTGTTGCAAAGTGCCTTCAATG
>c169104_g1
GACAAAGTGTGTCACAGATGGTGCTGTTTGCTAAGGAGTGGGCAAAGCTTCCGCCATGGAAGAAGATTATCACCTGAAAG
GGTTCAGGTGATGGTGACCGCTGGAGCTTGGAAAGCAGGGCTCGGTGGAGAAGCTCTTCTAAAACGACAAGGAATGGGTA
GTAACTCCTAGCAAGAAGACTTGTCAGACGGTCAAGAAGGAGATCAAATCAAGAAGGAGATCAAAGGAGACA
>c99861_g2
AGCGCCATGAAGGTGTCGCCGATATTAATGACGAGGGCGTCCGGTATCGGCCTGACCACCCGCCACTCGTCAGCGGAGAA
AACCTCGAGACCTTTGACCTCATCTTGCTGCTGAAGGATTGTGATCGATGTAGGGTCGCAATGCGGCCCGGTACCAAATG
TGAGCTCTGGTTCTTGACACGGAGGGTAGTAGTTGCACCTCATTATAGAGCTTCCATCATTGAAATACTCTCGGAAGTAC
TTACGATCGACGCCCAAACTTAATCCAAGCAGCTCCGCTATCGAGAGCGAGAGGCCCGTCATCGCTTCACAATATCTCTG
ATACACCATCCCCGTTTTCAT
>c106997_g1
AAATAATAATAATAATAATAAATATGTTGTACTTCTTCTGTATCATCTCCATTGTCTTCAGGCAAGAAATCTGGGAAGAC
CAACCTTGTGTCCAAACAGCTTAACATCTTCTTTGGTTTGCAGCTTATACTCTAAGAAGGTGAAGGGTCTGTAAAGGGAT
GGTGCTCCCTGACTTTTGATGATGGTTTCATATGAAGGGCACAACTGAAAGGCAGCAGAGAACCTCTCAATCTTTGGATT
AGCCATCACTCTATGCTCAACACTCTTGTAAACACCATTACTCCAGGCCTGAAACAAGTCGCCAATATTGACGATGAAGG
CGTTGGAATTGGGGTTGACGGTGATCCATCTTCCACCATTCATCAACTGCAAGCCGCCGACCTGGTCTTGGTGGAGTATT
GTGAGGAAGTCTGTGTCGGTGTGAGGGACCAAACCAAAGACTCCTTTTATCGGGCACGGCGGGTAACGGTTAAGCCTCAG
GTAACAAGAACTCGGCTTGCAGTTCTCTCTTATATAATCACTGCAGCTGCAGCAGCTGCTGCTGCTGCTCCCTCCCTCAA
ATCCTTCAGCCAATATCTCTGCAAGCTGATACGAAAGCTGGGCCACTCTCATGGCGTACTCATCTAACACACGCCTGGCC
CTGAGCTTGGTCGGTGCGGGCGCCGGCTCGAGAGGAATATGATACGCCTCGGACCACGACAGCTGCCTCAGCGATGAAGC
CGTCGGCGTGCCCCACGTGTAGCAGCCGGCGGCGAAGTCAAGCAGTCTCTCCCTATCCTTCTCGGCAAACGGCCGCCGGA
GCAGGTTAGCCTGCACCCTCCGCAGTCGCTTTAAAAGCCCTAGCGGCACGCCGTGGTTAACCACCTGAAAGAAGCCCCAC
TCGGCCGCGGCAGCCTTGATCTCGGCCTTACAAGCCTCCGGACGGCTGGTCAGATGACTGAGATCGATGAGGGGGAGGTC
GACGACGACGGCGGCTTCCTTCACCATAGGAGGAGGAAGGTTGTCGATAAGAAGCTGCTTGTAGGTTTTGAGAAATGGTG
GATTGGGGTCAGCTATCATGATGGCAGACAGGCTTCTGGTTCGA
>c112848_g2
GCATGCTCAGATGTCCGGTCACTCGTCATCTACCTTTTTCGATCCAGCTGAAAACCTAGCCACCACGGAATCGTCCACTG
TCACCTCCAACGAGTTCTCTGCTCCGTCTGCTTCCATGCTTCCCCCTGATTATGCCCTCCGGACAAACAACGGTGGTAGC
AGCCGTGCTTTGTATGGATCGGAGACTCAGATGGAGAGCTCTGGATCTAGAGATCGAAAACGGATGAGAACCTCCTCATC
CTCGTCCTCTTCTAGAGGGGGTTCTGGCGGAGTGATTGGACGGACTACACCTTCGGTTGGAACGATGACAGCCTCCGCCT
GCAGCACCGAGGTTTCGTCGTCGGCGATGCCGGTGGTAATGGTGGATACTCAGGATGTAGGGATCCGTCTGGTCCACGCC
CTTATGGCTTGCGCAGAAGCCGTGCAGCAAGAGAATTTCAAGGCGGCGGATGTCCTCGTCAAGCAGATATCTGTGTTAGC
CTCATCCCAGGGCGGCGCGATGAGGAAAGTCGCTGGATACTTCGCCGAAGCTCTCGCCCGCCGGATCTACCGCCTCAACC
CTCAGCAGGACTGCTCTCTGGACTCTGCCTTCTCCGACATCCTCCAGATGCACTTTTACGAGAGCTGTCCCTATCTCAAA
TTCGCCCATTTCACTGCCAATCAGGCCATTCTCGAGGCTTTTGCCGGCTGTCGCCGCGTTCACGTTATCGACTTTAGCAT
GAAACAGGGGATGCAGTGGCCGGCGTTGATGCAAGCCCTTGCCCTCCGTCCCGGCGGCCCACCATCCTTCCGCCTCACTG
GGATCGGCCCGCCCCAGCCAGATAACACCGACGCACTGCAACAGGTCGGCTGGAAACTCGCCCAGCTTGCTGATACCATC
CACGTCGATTTCGAGTATCGCGGGTTTGTAGCAAACAGCCTCGCCGACCTCGAGCCGTACATGCTCGAGTCCTCGTTGCG
GACCAACGGCGGCTCCGACGAACCGGAAGTCGTGGCAATCAACTCCGTCTTTGAGCTTCACCGCCTCCTAGCCCGGCCAG
GTGCCCTAGAAAAGGTCCTCGCCACAGTCCGTGCGGTTAAGCCGCGAATAGTAACCTTTGTCGAACAAGAAGCGAACCAC
AACGCCGGACCATTCCTCGAGCGCTTCACGGAAGCCCTCCACTTCTACTCAACGATGTTCGATTCATTAGAGGGTGGGGG
CGCCGGCGAGGGCCTCCAGGATCAGGTGATGTCGGAGGTCTACCTCGGAAGGCAGATATGCAACGTGGTCGCTTGCGAGG
GTGCGGAGCGGACCGAGCGCCACGAGACCCTCTCCCAGTGGCGCGGCCGCTTGGACGCCGCCGGTTTCCAACCCGTCCAC
CTCGGCTCCAACGCTTTTAAACAGGCGAGCATGCTACTGGCACTCTTCGCCGGCGGCGACGGCTATCGCGTGGAGGAGAA
GGAAGGGTGCCTCACCCTGGGCTGGCACACTCGTCCCCTCATCGCAACTTCCGCCTGGCGCATCGCCGGCGCCCCCGATT
CTTTCTCCGCCGACGCCGATGCCCCCTAATCGCCATCTCTCCGCCGCTCTTTCTAGCCTCATCCCGGCCGTCCATCGACG
GGCCCCGGCTCGACCCGACATCCGGGCCGGGCCGGTCCGGAAGCTTAAAGCTTATCCGGTCCTCTTCTTCCTCCCTCCAT
GTGTCGCTGCTGCCCGCCACTGCCCGCCACTGCCCGGCGCGTCCTTTTTCTCCCTTTTTTATTTTAATTATTATTATTAT
TATGTCGATTTTGTCCCCCCCCCTCCCTTTTCCTTCGCCTGCCCGTTTTTAGACTATGAACCTGTGATGCGTGTATCTAA
TCTTCCTCCTGTTTATATAAATAATTAGTGTAATGGCTGAGAATTATGAGTCATAATATTAAGTTTATTCATAAGTATTT
ATCAAAGAAA
>c70850_g1
GACTTTTTACTGCCCATTCAATCTGTTTATTTCTTAAATTAAGAGAATCATGTGCCAATGCTCTTCATCTTTGAAAGGTT
AAAAAGAATAGAGCAAATTACCTCCTTATGTAAGGCTTTCTTGATCACCCACTTGTCATGCACTTTATTATCTTTTATGC
TATTCATCAGGTGTTGCTCGGCGAAATATTTTGCTTGTTTTAGTATCTTCTCTCTTGGAAAAGCGATCTCAGAGAAGCGA
TACAAGTTGAAGGAGCCTGAAACTGTTTTATTCATCTCACCCACTAGGCA
>c116220_g1
TTGGCAACAACCCGCCTTATTATGTGAGATATGGATTGGAGTATATTGAGTTGCAGTCCTAACTTCATCGGCACATTAAA
CCGGGGTGTTACAGTAACTCTGTCACTGCAATCATCATTAAAGACTCGTCCAGCACTCATTTTAAGAAAATCTTCTGGCG
AGCTGTTACACCGCTCGTCGAGCTGTCCCGGCGAGCCTGGTCATGTGCCCTCCTCTGTTAGGTTAAGTTCTCATTCGACA
AAAGACATCAGGGGCCTGGTGAGCTCTTCCAAACCCGCGGCAACTTATTCTTAGTTGGCCATACATTTTTGGTGCAAAGA
ACCAAAGAATGAAAATGTGATTCATTGTATCCATAAGTTCACACCACGTGATCAAAAGCAACACTTACCAAACAAGGTGA
TAATGGCAAGATAATAGCTTCCCTTCCTGTAGAGGAAAATGCTACAAGAAGTCGGAGATGGCGGAGGAGAAGGCCTTGGT
GCCGGTTATCGATCTCGCGGACTTCCCATCTGTATGAGGCTTTCGGCCTCTACGACGCCGCCTCCGCTTCCGACGTCCGA
GACTTCTGCTGCCGCATGGAAGCCTCTCCTTTCTGCAGAACTACAAGAATGCTGTTCAACTTTGTGGATTGTGATGAACA
TTGCAGAGAAACAATCAGCTCATATGCTTCCAAACTCCATGTTTTGATTGTGAACATAGCAAATAGAGTGGCAGAGAGTT
TGGGTGTTGTGAACTACTCGTTTCAGGATTGGCCCTGCCAGTTCAGAATAAACAAGTAAAGAGACTGTCGGCCTTCCCGG
CGTTCAGATCCACACAGATTCCGGCTTCCTCACCGTCCTCCAAGAAGATGAGTCTGTTGGTGGGTTAGAGATCATGCATT
CTAGTAGAGATTTTGTGGCTATTGATCCTGTTCCTGACACCTTTCTTGTTAATCTTGGCGATGTCGCAAAGGTTTGGAGC
AACGGGAGATTGCATAATGTAAAGCACAGGGTGCAATGCAGGGAAGCACTGCCTCGAATCTCTATTGCGCTGTTTATGCT
AGCACCGAAGGATGACAAGATGGAACCTCAGCAAGAACTCATTGATTCTGAGCAGCCGCGACTCTACCAGACTTTTGTGT
ACTTGGAGTATCGAAAGCTCAGGTTCTCCTCTGGATTAGAAGCTGGTGAAGCCCTCTCCCTTCTTGCAGCTGATCAAACG
AATGCGGTGGCTTGATATAGGATGTAAGTTTTTAAGCTAAATATGTGATTCTGGAACTGATAGTTCTGATGCCTTTATTG
ATGCTTTCCTAGTGATACAAATTGTTATAATACTATCAAGTTTTAATATTGTAACTAGATTTTCTAGATCAATTACTTGA
GGGAGGTGAAAGCTATGTCTTTGACAGTTTATCCTCTTTCTTGAACTGTGCATCCAGTGTATCCCAGATCACCTTGGCAA
TTTGACGCTTGTTGTAGGTTTCCGCTATCCTGTCGGACTGATAAATGAGAAGATTATCACACAAAAGTCTTTGTCCTTGG
GCCACTAATAGAACTTGGCAACCTACTTGGTGCAAGAGGAAGCCAAATCGAGCCGTGAAGAAAATGTTGATATACTTCTT
CCATATTTGTTTTGCGCTTCCATGCATTGATCACATGGTCAGAGAACTCCAGCTTGATCATCAGGACTGGGAAAGAGTCT
CGACAATTTGAACTCGATAAAAGGAGATGAAGATGGAGGTTGGAGATGATTTCCGAAAGAACCACGATGAATTCTTTGAC
AAAGGAGTGGTGTTAGCTTTTTTGTTAGTCGAAGGAGCCAGCGAAGGCAAGTTTGCAGTCTACCCAAGGAGTTTATGATG
AAAACTTTGGTTACAGCTAAAGGAGAAGATGACGGCTTGCTGAAAAAGACTAATCAGCTAACTTGCAACTAGATTCTTAG
GTTCGGTTGCTCGAAGTATACCAAACTAGGTCAAGTTTTGAATCTTATATGCCTTACCCACAGCTAGGTATTTATAATAA
ACTCTAAGTTTGACGGGTTATCAGACACCTTAATGGGCCCTTCTGACCCGTCAGTCACTCGAGGCTGATGTATTGGAACA
TATATCAGCATTTTTAACACTTAGTTGGAACTAGATTGTTAGGTTAAGTTGCTCGAAGCATATCAAATAGGGTCAAGTTT
TGAATCTTATTTACCTTAACCCCAGCTAGGTATCTATAAGAAGTTTTATTTTTCTTCACTTGTAAACTTTTGTAAACTTT
TGTTTGATACAATGGAAGTGAGCACTGTCTCGTGATTTTTCCTTTGTTTGTTTGAGAGAGGTTTTCCATGTAAATCTTGT
CTTGTGCTCGTGTTTGTTCTTTATTTTATATGGATATGTGGAGAGCTTTATCTCTTTGAGTGTGTATGGTTTTGGTTGTG
TTTCCGCATTAAGTCGCAACACATTACTCTGTGATGCATTATGTATCCCGCAACAACGACAATGAAGGTTATAATTCAAT
CTTTCTCAGCTGTGCCATTACTTTGTTAATGTAGGCTTGGAGCAATGGTAGATTGCATTGCAAGGAATCTCTGCCGCGGA
TCTCTATCGCGCTGTTTATGCTTGCGCCAAAGGATGACGAGGTCGAGCCACAACAAGAACTCATTGATTCCGAGCACCCG
AGACTCTTCAAATCTTTTTTGTACGAGGAGTACCGGAAGCTCAGGTTCTCTTCCGGGGCAAAAGATGGCCGGACCCTCTA
TCTTCTTCTTGCAGCAGATCAAACTGCAGTGAAAAGCCTTGTGATTTGATTGTAGTTTATGATTGTAAGCAGCTGAATCT
GGAACTGATACTTCTGTTGTCTGGGTGTGATTATGATTTCTTAGTGATCATGAAATTTCTCATATGTTGTTAAAAGAGAA
TAAATAGTTATTATTATGTCTTCTGCTAATAAAACCATGTTCTG
>c112106_g1
CATGTTACAGTTCTAATAGGTCATCTTGAACTAGTTCGATTTATCTTGATCTATTACTTCCCTCCTTTCAAAATTCGCCT
TGTCATCACATTGTAGTTTAAGAAAGTAATGTCGAAACTCCTCGCATTTGATCTAGGAATTGTCTTTCTTGGGAATGTCT
TTCCATTTTACCTAGGTCTCTGTGGTGTAATTGGTAACTAACTTCCTCAATCGATATTGAAGCATTGCCTTAGGATAGAG
ATTTATTTTACCGACATCTATCATTGGAAAAAGTGTAGCTACTACACTTATTTATGAACCCAATTTTGTCTTCAATAATG
AGACATGGGGCATCACATAGAGCTTAGATCCATCAGAGAAGCTCAAGTTTATTTGTCACTAACCCAAATATCTCAATCAC
TTGGAACGTGCCATAGAACTTGGTAGATAACCTTGTTCAAGGCCTTCAAACTAAGGGTAAAATTGTTTATGGTCATTTTT
ACTTTAAGAGCTTGTAAAGCCTGTGTGGTTTCTTCTGTCCATGCGACATTTTACTTTTGTAGGAGGATGCCCAATGGTGC
GCCAATATTTTTATAATCCTTGATGAACTTTCTATAGTAGTCTATCCCCAAAGAAGCCCAACCACCCTTTTACTGTTTTC
TATTGTGGTAATTCTTGCATTTTTTGAATTTTTCCGACTTTGTCCGAACTTTACAACCAAGGTGTGAAAAATTGAATTGA
GGCTCTTTAGGCTGGTCATACTCTTTTGGAGGGGCATCGATAAGAATGGTTGCACACTGGACGAACATGGCTTGACTAGT
TAGCTCCCATTGTTGGAAGGTCAGTCAATTTATCATTAGTCAATGAGGCATCATCAATTCCTACCTTGGGCATTTCTTAC
TTATTGATGACCAAAGTGATGTTCTTTTCCATCAACTTCTCAAACATCTCGGCCATTCCTTGAGTTTTTTGCTCAACCTT
TTAAACTTGCAAAATCCTCTTCATGCCTAGCGGAAGCTTTGTCTGATCCTTATAAAAATCAACATCATTTCACATAAGTA
AGGTTGCAAGAAAGAGCTCAGATATCAAATTGATTCGAATTTTCTAGCGGAAGAATTGATCAACCTACTTTCAAGTTGTA
AGGAAACTTCCCGATGGAATAATATTAATGCACATCCAAACAAACATAAGACAAAGAGAGCCTGATCGGACATTCATCGC
GTTAAATCGGTCGACCGAAATGACGTTGCATTGAGTTTGAAAGAACTGAGCATGTGTGGGCGCAGTTAACGCTAGGCCGT
TTTGCCCAATGCTAACTATGCCACTTGACATTCGGTGCCATGCCAGCCATCAGCCCATTTGGACGCTCGGGTCCATCCCT
CAAAATACCTGTAACAGCTGCTCGCTTAGAGTAGACACTAGACACTATATCACTGAAAGTTACACTTGCATTTCTTATAA
CATTTACATGAAGACAGTCATTGAATTTTATGTTTGAAAGATCCAGGTTGGTTCCTTGCTGTGAAGTTTGGGCTATTCCA
CTGGCTCAAAAAGCACCTTCGAAATGTGGTGGTTGAGTGTGGTGGACGGGCACCAGGCCATGTAGTAAAAGCTCTTCACA
ATAGCCATGAAAGTCTGCTTGGTTTCTCTGCTGAGGCCACCGGGGCTCTGAGGCTCAAGTACGCATTTTATCAGCTCCTG
CATCTCTGATTTTATATCATTTTCAGTGCTGTTCATTATCTTCTTTCCCTCAGGGACCCATGCACAAACTTTTAGCCGAC
TGCAGATGGAGGAGGTGAGTCGCGAGAGGCAAGTGTACTCCAACCGAGCCGCTTCGCCCTCGGGCTCGGTCCGACCCGCG
CAGAGCTCAATTGTTCGGATTAATAGCAATGCTGTTTCCCCTTGCACTAACCAACTCTTCTCTTGACTCTCTCCTTCCTG
CAATTTCAGCAGCCACTCCATCCAGGCCCGTCGGAGGTGGTGGCGGAACACCTGAACCGGTAGCTGCTTGCGAGCAGGCT
TGTCCGACATGACATTTAGGAGGCCGAACAAGCCCAAAATATGTCCCACCAGCCCCTCCCCTATTTGCTTCCACCCTGAC
CACAAGCTTCGTCGGCTAATGTGAAAGTCCTCCGTGAAGTTAAGCCCGGACTCACGCACGGCGGATCGGTGATAAAAGGA
GGTGACTGCTTCGGCCAACACAGCGGTTCGAGCCCAGCTTAGCCGCTCGGCCGATCGGTCCGGTTCAAATATGGATGTCG
CCGCCAAGAAGTAGGCATTCAGCATGCTCTTTCGCACCGTGCCATACTCTTCCAGCTCACACTCCTCATACCATCTTTGC
AAGCCGAGCCATTCGAGCTGGTGCACAGCCTGGCACTGGTTGAAATCGAGCTTGGCTAGATCCAAATAGGCGACGTGGTT
CACATACAACATCCTGTAGAGCGTCTTTCCGATCCAGATATCGTCGCCGCCCCCATACTGCTCGATGTACCACCTGGTCT
CTATGCGGGGCAGGCTCGCATAGAATGGAAAGTCCAAAGCATACGCCACCTCGCCGGGCAAATCTTTGGCAATGACCCAC
TTGTCAAGCAGCTGGTTGGAAGCCTGCTTCTCCCGGAGGAAGCGGCGGGAGAAAGCCCGGGCCCGGTCCAGGATCTCCTC
GCCGGAGAAGACGAGCTGGGACGCCCTGTTCAAGTTGTACATTCCCGTCACCGCCTGATTCGATTGCCCGATGAAGCCGA
AGAACTTGCCGTCCCTCTCGAAATTCCGAAAAACATCGGGAGAGACTTTGTATCCGTGGAGGCGGAGGAGGCGGAAGCCC
ATGGCCGTGTCGTCGATGTCGCGAACCTCGGAATTCCTCGCCCAGCACAATCCTTTCTCGCTCCAATACCTGAAGACGTA
TTCCATCAAGTCTTCCACCTCCGGTTCAAAATACCGGGAAATGCCGAGTCTTTGAAGCCTGTCCACCGCCCAGAGATGCT
CGAATATGTCCACCGGGTACACATTTGGCACTTCATATCCAAAAATCTAAAAATCATCGAAAACTGTTCTATCCTTCTGC
TGTGAATCACTGCAGAGATTTCTTGGAAATAATGATAAAAAATGGTTTTTTTTCTCTTATGTTTACCTCCGCCATGAAAT
CTCCTCACGACCTTCTTGAGATAAGCCAAGCAGTTCTCGTCTCCCGTCTCCATGAGGGCGTAGGCGGTGGAGGACGGCGA
AAAGAGGAAGGATCCTTCCGCGCTCTGTAGCCGGAGCAGCTTCTCCCAGTCCAGCCCCGGCATTCCTTCCAAGCTATGAA
GCAGTGTCGTTGGCATTTTATGCATCACCTCCCTCGGAATCCTCTTCATCTTTATCTCCCTCTTCGCATAAATGTCCTGC
AGAGCAGGGTGGTTGTATGGGAAATCCAAGCCCAGGCCTTTGGCTATGTCCATTAGAGAGGGCAGGGCCACCTCGAAGCC
TATGGGCATCAGCTCATCGTGGTTATCTTCGCCCAGCCTCCACACGTTCTCCTTCAAGAACAGCAAACCTCTGTCACACT
GCTCGGGGCAGACGTTCCAGGAGCGGAGGGCGACGGCGCATGCGAGCGTGTTGATTATCCGGTCGTGGGCGCAGAAGAGT
TCCTCGTCCCCCCACGAGCCATCGTCGAGCTGGTTGTCGATGATCCAGCGAAGGCTGGAGGGAAACTGCGGTCCGCCGCC
GCTGCCGCCGCCGTCTCCGGTGAGATTCGGGACCATGGCCACCCACGCTGTGTCGTAGGCCGACGCGGTGATTTCGCCGT
CATTCATTGAGCCCAGCATTGCCTTCACCTCTTCAACCAGCCCCCATATCCCCCCTCCTTCTCGTTGCTTGCGAGCTTCT
TCTTCTTCCTGCCGCTCTGGGATTTTCTTGCGCAACTCAACTTCTCCTAACCTCTTCTCGATAAATTTCGAGCGGTACTC
TTGAGGCCCTGTTTTCAAAGCTGCATTTTCTCTCCAAGGAGAAGAGGGGAGGGCCACGTCAGCGTTTCTCCTCCATCGTC
CAATACCGCCTTTCCCGTGGAAATCAGGCGGCGGCTGAAGGGAGTTCCGGAAGGTCACCGGAAATTGGGCCGCTTGCATT
GCCGCCGGCGAAGTCATGAGCTTTTCCGCGGAAATAACAAAGAACAAAGGAATGGGCGTAGGCCGGAGGGTCGGGCTTCC
CCTTTGGTGAGAAGAAGAAGGGGGGTGAAGTTCAAGAGTGAGAAAGAAGAGAAGGCTTTATGCAAAAAATATAAAGGAAA
AAAGAGGTAGG
>c90765_g1
CAAACACTCTCAACGCCTCTCCTGCGCTTTTCGCCCCCTCCCATGGACTCCCTGAGCCCCACCACCGTCCTCCACTGCCC
GGCCATCGACGCCGGCGCCGCCATTAACGGCATCGTCTTCGACTCCTCTCACCTCAGCAGCCAACCGTCCATACCCCGTC
AGTTCGTCTGGCCGCGAACCGACCGATCCACCATTGTCCACGAGCTGCAGGCGCCCATCATTGACCTCAACAGCTTCTTC
CACGGAGACGAAGAGTCGACAAAACTAGCCGCCGGCCGCCTCCGCTCCGCCTGCACTGAACACGGCTTCTTCCAAGTCAT
CAACCACGGCGTCAGCTCCACCCTCATGCTCGACGCCCTGAGTTGCATTGACGATTTCTTCTCCCTCCCTCTTCTCCAGA
AGCTGAAAGCTCACAGGAAGCCTGGCAGCATGTGGGGCTACGCCGGCGGCCACACCGACCGCTTCACCACCAAGCTCCCG
TGGAAGGAGACCCTCACTTTCGGCTACGACAGCGTTCCCTCGCACTCCTCCATCGTCCTCGACTACGTCGCCTCCACCCT
CGGAGATGATTTCTACACAATGGGGCAGGTGTACCAGAGATACTGCGAAGCCATGTCCGAGCTCTCTCTATCGATCATGG
AGATGCTGGCCATAAGCTTGGGGGTAGAACGCTCCCTCTTTCGGGAGTTCTTCGCTGAGAGCAAATCCATAATGAGGTGC
AACAACTACCCGCCATGCCAGGAGCCGGAGCTCACCTTCGGAACAGGTCCCCACAGCGACCCGACCTCCCTCACAATCCT
TCTCCAGCAAGAAGGGGTCCACGGCCTGGAGGTCTTCACCGGCGGCGAGTGGCGCGAGGTGCGCCCGGTTCCCGGCGCTC
TCGTCATAAACATCGGCGACACGTTCATGGCACTGTCAAATGGTAGATACAAGAGTTGTTTGCATAGGGCAGTGGTGAAC
AAGAAGCAAGAAAGGAAGTCACTTGCCTTCTTTCTGTGCCCTAGAGATGATAGGGTGGTGAGCCCCCCAAGCTGCCTCGT
GGACGAAGAGCACCCGAGAAAGTATCCAGACTTCACATGGGCCGAACTTTTCAACTTCACTCAAACTCAGTATAGAGCTG
ACATGCAGACACTTCAAACCTTCGCGCATTGGCTTCTTTCTGCTCCCAACTTGCTATAGTTCTCAGCAGCGGTCATCCCC
TTCGGGTTCCTTATCATCATATGACAGAATGAATTTATACTCCCTTCCTTATGAAATGAAATATTATTTTTGTTACTAAT
TATGGAAGTAAACCTTTGCTTATAATTCAAAGGGTATGAATACATCCATGCTTGATAAT
>c85242_g1
CTCGTAAAAGTGCATCTGGAGGATATCGGAAAAGGCAGAGTCCAGAGAGAGAGAGCAGTCTTGCGGTTGGACACGATAGA
TCCGGCGAGCGAGGGCTTCAGCGAAGTATCCAGCGACCTTACGCATTGCGCCGCCCTGCGAAGAGGCTAGCATGGAGATC
TGTTTGACGAGGACATCTGCTACTTTGTAATTCTCGTGTTGAACTGCCTCAGCACAAGCCATTAGGGCATGAACTAGACG
AATACCGACTTCCTGGGTGTCCACCATCACTACTGGCATCGCGGAAGACACCTCGTTGCCGCAGACAGAGCCAGTCAAAG
ATCCAATCACCGGAGAAGAGTGTCCGTTCACTCCGCCAGATCCGCCTCTGGATGAGGAAGAAGAAGAGGAAGTTCTCATC
CGCTTACGATCTCGAGATCCGCTTTCCATCTGAGACTCCGAACCGTACACGGCACGATTGACCGCTGCGTTGCTCTTCCG
GACGGTGAAATCCGGGATGGCAACTGGAGCTGGCGGGGCACAGAAGTCCACGGAGGTGATGGTGGATGACTCCGTAGTCG
TGAGTGTGTCGGATGGATCGAAGAAGGCCGATGACGAGTGAGCGGACATCGGTGGTGGCGGGAGATCGTAACCACTCGAA
TTGGAATCCATCGCCGGCTGCAGCTGAAGAGGAGGAGAGCCGAGCTCAGAGAGCATGCTCTCAAGC
>c105461_g1
TGCTGCTGCTGCTGCTGCTGCTTGGTATCACCACTACAATTCTCGTCTTCTCCACTTCTCCACTTCTCCGCCCACGTCCA
CACTATCCATCAATCGATCCATCGATCTATATATATAACACCACAATAACACATCAGTGCACTCCCTCCCTCCCTCCGCC
TTCTCCATAAAAGTTAAAAATCAAAGAAGCATGCCTTCTCTTTCCCTCGACCACTTCGACCTCCACTCCGCCCTCCATGT
CCCGGACTCTTACTCCTGGCCCTCCTCCTCTCTCCACGACTACCCCACCGTCGCCACCTCTGCCTCAGACGCCTCCCTCA
TCCCCATCATCGACATCTCCAGCCCTACTGCGCCATCCCTTGTCAGCGCCGCATGCCGCTCCCTAGGCGTCTTCTATGCC
ACAGGACACGGAGTTCCCACCTGCCTGCTCAATGAAGTAGAGTACCAGGCCCGCCGCCTTTTCTCCCTCCCGCTCCACCG
GAAACTCCTTGCATCCCGCCTGCCTGGCTTCTTCTCAGGCTACGGCCGGCCTCCGCTTTCGTCCTTCTTCTCCAAACTCA
TGTGGTCCGAAGGCTTCACCGTCGCCGGCGATCCCCTCGACGTCTCCGGCATTATCTGGCCTCACGAACACTCTATCTTC
TGGTTTGTTGCAGTTGCAGTTGCTGGTGTAAAATTTATATTTGCTTAATTTCAGTGTTTGAAGAATCATTAACATGATTC
GCTCGCAGTGACGTGTTGGGAAAATATAACAAAAACATGAAGGAGACGGCTAAGAAAGTTCTGAACGTTGTACTGCTGTC
CTTGGGTCTCGACGATGAGGTAACGGGGGGTCGGGCCGGACTGTTGAAAGAGCTGCTGGGCCAGGCTGCGGACGTGCTCC
AGCTCAACTCCTACCCGAGGTGCCCCGAGCCGGAGAAGGCCATGGGGATGGCCGCTCACACAGACTCAGGACTGGTCACC
GTCCTCCACCAGAGCGCCGGCTCCCACGGCCTGCAGGTCCTCCACAAAGAGGACGGGTCAGGCTCGGCCCGATGGGTTCC
CGTCCCGCCGCTACAAGGTGCACTTGTTATTCATGCGGGCGATCTTCTTCAAATAATCTCCAACGGACAGTTTAGAAGCG
CGAGGCACCGTGCAGTCGTAAATCGGGCCGAGCATCGGATCTCAGCAGCTTATATTGTGGGGCCTCCTGGACATGTCAAG
GTGGGACCAATAATCAAATTGATAGAACCCGGGCAGCGCCCGATGTACCGACCCGTTACTTGGCCCGAGTACCTACAGAT
TAGGGCTCTATCATTCGATAAAGCGCTTGAGGCCGTGGAATTAATTACCTGATAAATAATAATAATAATTAATGTCTTGA
TGATGGAAGAAGCAAAGGCAATATAATAAATTTTTTTTTTTGGGAGAGATGTAAATATTTTTTTTCTTTTTTATAAAGTA
G
>c121406_g1
GATTACCACCTGGCCCGCAGGCCATTTTCTCTTCGGAAATCTGCGAGAATTTAAGACTCCTCAACGCTGGAAAACATTTG
CTAAGTGGGGGGAACTTTATGGTGATATTGTGCGCATTAGAATCTTCAAGCGCTCGGTAGTCATCATCAACGACCTCCAT
TCAGCTCTTGAGATTCTCACAAAACAGTCAGTAGCTACAGCTGGGCGACCACGGTTTGTCATGGTATGTGAACTCATGGG
CTTCGACACTGCAACCGCTACCTCCCAACCCAACGAGTTCCACAGGAAAATGAGACGATACATGGTTCCAGCACTCCATA
CCCGAAACTTTTCTGAACGCCATCCAATCATTGTCGAAGAACGTGATATATTATTGAATAAACTCGAATTCACGCCATGG
GACTTTTCTCAGCATCTCCGGCGGGCGGTAGCTTCTGTTGTCCTGCGCTTCGCGTATTCGCACACAGTAGCACAGGATCA
TGACCCGCTGGTTGAACTCATTAACAGGTCTTTGGAATCCGTGTCTATTGCCTTATCAAGCACTTACTTGGTGGAATTCT
TACCGATACTAAGGCATATTCCGGAATGGTTTCCTGGCGCTAGGTTCAAGACTCAGGCCAAGGAATGGGCAGAAATCAGG
CGTGAATCGATCGAGGCTCCATTTTTAGCTGTTCGGGACAAAATG
>c103504_g1
CATGAAACAGGGGATGCAGTGGCCTGCACTGATGCAGGCGCTCGCACTCCGCCCCGGAGGCCCGCCATCCTTCCGCCTCA
CTGGAATTGGCCCTCCTCAGCTAGACAACACCGATGCCCTTCAGCAAGTCGGTTGGAAGCTCGCCCAGCTTGCAGATACC
ATCCATGTTGATTTTGAATACCGTGGCTTTGTCGCAAACAGCCTCGCAGACCTTGAGCCCTACATGCTTGAATCTCTTTC
ACCGGCAAGCGGTGGTTCCGACGAGCCGGAGGTCGTGGCAATAAACTCGGTCTTTGAGCTTCACCGCCTCCTTGCCTGGC
CAGGGGCGTTGGAGAAGGTCCTCGCCACCGTTCGCGCGGTTAAGCCGCGCATAGTGACCATCGTGGAGCAGGAGGCAAAT
CACAACACGAGTCCGTTCATGGAACGGTTCACAGAGGCGCTGCACTACTACTCCTCAATGTTTGATTCGCTGGAGGGCGG
CGGCGACGGCACCGGCGAGGGGCAACATGATCAAATGATGTCCGAGGTTTACCTCGGGCGCCAGATCTGCAACGTCGTGG
CATCTGAGGGGTCAGAGAGGACGGAACGGCATGAGACGCTGTCCCAGTGGCGGGCGCGCATGGGGGGTGCTGGATTTGAG
CCCGTTCATCTCGGCTCCAACGCTTTCAAGCAGGCCAGCATGCTCCTCGCCCTCTTTTCCGGCGGCGAAGGATACCGGGT
GGAGGAGAAGGAAGGCTGCCTTACTCTCGGGTGGCACACGCGCCCCCTCATCGCCACCTCCGCCTGGCGTATCTCCGGCC
CCAGCGAGTCTCTCTCCGCCAGCGCCTCCGCCGATGCCCGCTAATCTTAATGTGCCGTTGCCGCAACCGCCGCCGAGAAA
AACCGGCCCAGCTCGGCCGAACAGACCGGCTTAGAGTGATTGGGTTTTGGTTAACCCGGTTCAGATCGTAACATCACACC
TCCATGTTATCGTGGCTCCCACCACCACAGCCTGGAGCGTCCTTGTTTCCAGTTTGCGCTCAGCTCTCTTTCTCTTTCTG
TGTCTCTCTTTTTTTTAAATTTAATTTTAAATTTTGTAGGCTTTGTGCTTCCCCAACCTTCTCTCTTCTCATCGGACCTC
TCATCTCCATGGCTGGCTCGTTTTGAGTAAGAATCTAATTTTCAGCTATGTTTGTATATAATGATAATAAACTCCGAACG
AGTATTCTTTCTATCTTTATATGTAACTTTGGAACTGCAATCATGATGATTGATGAATGAATAGGAGGGGAGGGTATCAG
GGGAGCAGGAAACAGCTAGCTTCAACTGTTTAACTGCTATGATGGGGTTTCCTTTTCTAGTCCCCTCCTTTTTTTTTGGA
TTCGGATCTCCTGGAGTTCTTAAAAGAACTCCAAGATGGAGTTCCTGATTTTCCGCCTT
>c87256_g1
GTCAGCTAGCCATCATGATCGCTGACGCCAATCCGCCATTTCTGAGAACTTACAAGCTTCTCATCAACGATCTGACTCCT
GCTCCGCCGCCTCCGGCGGCGATGGAAGCTGCCGGCGACCTCCCCCTTATCGATCTCAGCCGTCTGGCGAGCGAGCCGGA
GGCATGCAAGGCCGAGATCGTGGCCGCCGGCGCCGAGTGGGGCTTTTTTCAGGTAGTTAACCACGGCGTGCCGCTGGAGC
TTTTGGAACGCCTGCAGAGGGAGCAGGCTAAACTGTTCCGGCAGCCGTTCGCGGAGAAGGACAAGGGGAGGCTGCTTGAC
TTTGCCGCCGGTTGCTACACTTGGGGCACGCCTACGGCTTTGTCGCTGAGGCAGTTGTCGTGGTCCGAGGCATATCACAT
CCCTCTCGAGCCGTCGCCGGCACCAACCAAGCTCAAGGCCAGGCTTGTGATAGAAGACTATGCAGTGAGAGTGGCCCAAC
TTTCATATCAGCTTGCAGAGATATTAGCACTAGGATTTGAGGGAGGAAGCAGTTATAAAAGCAGCAGTGATTACATAATA
GAGAACTGCAGGCCCAGCTCTTGTTACCTGAGGCTGAACCGCTACCCGCCGTGCCCGATAAAGGGAGTTTTCGGGCTGGT
TCCTCACACCGATACCGACTTCCTCACGGTGCTTCACCAGGATCAGGTTGGGGGCTTGC
>c112559_g1
TTTGGATAAGTGATCTTCTTTGCTTCAAAAGAAGAACATTTTCTAAGAATTTTATAATAGTTTTTGTAGACGGCTACAGT
GGATCTGCCCCAAACATATAAATCAGAAAATAAGGTCAGATGAATCAAATAAATCAAAATGGTTCCAATCCCAGAAGTCC
AGAAACCCATTTTCTCAGCAAATTGCAGCTCCAAAACCTGTACATTTCCCACTTAGACATTCACAATTTAATGCTACATG
AACAAAATTTCAAGATACAAGCAGTTAAAGTTTGACAAAAAAAGAATTTTGCATCAGAAGATCAGAAGATCAGAAAATTA
TTCCATCAAGCTTTTATTTCAGCGATCTTCAAAGAGTTTTAAGGATCTTAGAACTCACAGAAACACCGGACTTGCCGAAC
GAGAAAACCATAGTTTACGATAGTTTTTTATTGACCTGAGAAAGAACATAGCTCAACCTATTTAGGAGTGACATATAAGC
CTTATTGCTGCACCAAATCACCTGCTCCCCTAGGTCTTATAAAAGCTTGCATTGGATAGAGTTTGTGAGTTGTGAGTTGA
ACAGTATCAATATTCTCTTCTTCTCCTTCCTTCAACTTCCAGTGGAACTTCTGTATTAATCTACCAATAGCTGTGCAAGA
AATCAGCATTGCTTGAAGAGTTCCGGCGCATGCCCTTTTCCCTCCGCCAAAAGTCATTGTCTTGTGCATGTCTATTTGTT
CATACTTGTCTGATAGGAATCTCTGAGGCTTCCAGTATTCTGGTTCCTCCCAATCCTTTTTGTTCATGTTGCATGCATAA
AGATTGATGGTGATATCAGTTCCAGCAGGAATGTTAAAGCCGCCCAGCTGTGTATCTTCATGAACATGTCTGGGAGGTAT
GATAGACACAGGAGAATGAAATCGGAGTGTCTCATGGAAAACAGCATTTAGATATGGCATGAATTGAAGGTGCTCCTCAG
CTAATTGTTTTGATCCGCAGACACTGCTTATTTCCTGATAAAGGCGATCCTGACATGTTGGATTCTTCGCAAGTTCATAC
ATAGCCCACTCTGTTGTGACCAATGTGGTATCTGACGTTTCTATGATCGATTCCCAAACCAATGCGATGAGCTGCTCCTC
GGTTAGTGTATTCTCTTCTGACAGCAAGTAATCCAAATAAGAACTGATTTCCTCTCCATGAGTAATTTTCCGCTGCTTTT
GTTCCTTAATCAAGTTCTTTGTTACTGCCCTTTTGCGGGTCTCCATTTGCTGAATTTTCAGTTCCAAATTCTTATTGGGA
ACCCATCTCAAGTATGGGAAGAAATCCCTCCAATCAACCTCAATAGCTCCCATCATTGGATCAGTAACTAAGATCTGAAA
CATCTCTTTCTTTGTCACTGTCATTCCAAGTTCCTCCACATAAACAGACTCCATATCCTTTCCTAAACTCTGTTTTAAGG
CCAACCGGAATAGCTCGGTTTGGAAAGGCTCTCTGAGTTCCACCAAACAAAGTTCTTCATCCTTGACCTTGGAAGACAAA
TTAGTCACAATATTCTCGATCATTGTGTCCCTGTGATGACGATTTCGCTTCTGAAATAGGAAATGGAAAGAGCTGCTCCA
CTAAGTTTGTAACATGCAGCAACGAACAAACAGTAATGGGAAGAGGATTAATAAACACAAACATTTTCTTAAAACCTGAG
CATTTGTTCCCAAAATTCCAGAAAGCACATATCGTTTAACCATTTTATGGTAGTCACCATAATCGCTCATTGCAACAATT
GATTTATTGCAAGTGAGAGTTGTCAAAGCTTTTGAAAGCTTCCGGGTTGATATGGATGAGAACTTGCTCACTAGCGCCTC
TTTGGCGAGTTCTGTCGAGTTGAGAACAACCATAGACGAAGCTCCGAGTCTAATCGAGTAGATAGGGCCATAATCTTCAG
CCCATTTTACAAACGTTTGGTAGGGCTTCTTCTCCTTCAACTGAAGCAGGTTCCCAATCAAAGGCCAACCAGGTACAACT
GGCGGGGAGTTGGGCGGTCTTCTCTGATCTATGAAAATCTTGCCAATAACAAAGCAGAAGGAGACCGTCGCAAGAGTCGT
CCCCAACGGAATGTTCTGTAACAGAACGTCCATTACTGCCCCAAGGTCTTAACTTGCTCTTCTTCCTCGCCTTCTTCTTC
ACTGCCAGTATCAGATTCGGCTAGATTACTAGGGCTTAGAGAGAGCCAGGGGAAGGAGATCGTCAGCGGACCATCACCAA
GCTCTATTATAAAAATTCAATTTTTTTTCTGTAAAAGTTGATAAAGCTGATGATTTGTTATAACAATTAATTAATCTTTA
CTGGTTTTTCTCAAATAAGATAAGACTAGTGGATTTGCCATGCATA
>c112636_g1
TTCTCTTCTCTTCTCTTCTCTTCACCCTCTCAACTACACTGAAAGGAAATGCCTTCTCTCTCCCACGACCACTTCGACAT
CTGCTCCGCCCTCCGCGTCCCCGAATCCCACTCCTGGTCCTCCTCCCACACCCACGACCACCCCTCCGCCGCCGCCGGAG
ACATCCCTGTCGTCGACATCTCAGCCCCCGATGCCGCCTCCCTTATGGGCGCCGCCTGCCGCTCCTGGGGAGCCTTTTAC
GCCACCGGCCACGCCGTCCCCGCCCGCCTCCTGGGACAAGTCGAGTACCACACCCGCCGCCTCTTCTCTCTTCCCCTCCA
CCTGAAGCTCCTCGCCGCCCGCCGCCCCGGCTCTATCTCCGGCTTCGGCCGCCCGCCCCTCTCCACGTTCTTCCCCAAGT
TCATGTGGTCCGAAGGTTTCACCCTTGCCGGCGACCCCCTCGCCGTCGCCTCCCTGCTCTGGCCTCAGGACCACTCCTCC
TTCTGCGAGGTGATGGAAGAGTATATGAAGGAGATGAAGAAGCTGGCTGAGAGACTCATGAAGCTCATGCTGCTCTCATT
GGGCCTGGATGAGGAGGAGATGGGCCGGGTCGGGCCGGTAAAAGAGCTGCCTTTTGCCACCGATGCGGTGCAGCTCAACT
CTTACCCGCCTTGCCCGGAGCCCGAGCGGGCCATGGGCATGGCCTCCCACACCGACTCCGCCTTCCTCACCGTGCTCCAC
CAGAGCGACGGCGCGGGCGGGCTCCAGGTTCTGCAAGAGGATGACAAGTCGGGTTTGTCCCAATGGGTCGCGGTCCCGCC
CCGACCCGAGGCCCTTGTTGTTAATGTGGGCGATCTCTTTCACGTGCTCTCCAACGGCCGGTTCAAAAATGTGCGGCACC
GCGCCGTCGTGAACCGGTCCAACCACCGGGTCTCGGCGGCTTACTTCATCGGCCCGCCCGCCCACGTAAAGATCGGGCCC
ATAAACAAGCTGGTGGAGCTGGGTTTAGGCCCAGTGTACCGGCCCGTAACCTGGCCCGAATATTTAAGCATAAGGACCCG
GCTCTTCGACAGGGCGCTCGACTCTGTGAAGTTGCAGAAGAGGTTCGAGGAGGATTGATTGAAAGCTCTGCTGCTACTAA
TTTGATGGCAGTATAGAAAATTACTAATTCGTTTCCACATTTTATTTTTTCCAAATTTTTTTGTTGTCTCCATGTATTTG
AGCAATTTCTTCTGGAGAAATGTAAATTAATGAGATTGGAAGGAAGAAGAAGAGTAATAACTGATCTTCATGATGAAATG
CATGCTTGAAACTACTGACACAGCAGGAATCGGAACAGAGCTAATGATTCGGTCTTAAAGCTTTCAGCTTTCCGTTTTCT
GCCATGGAACATGAGAAAGTAATGAGATTTTTGATTAACAAACAGATCATGAAAGTGTCATGGAAACAAAGTAATTAGAG
ACTTTAATTACTCGGAACAGTAACAGAGGACAGGGATAACGACATGACCGCCAGGGGGGAAGGAGAATAATAAGCTACTG
CACCAAAAAAGGATTGATTTTTGGCATAGACTGTAGAAGGCAATTAGGGAGGGAGCTCTAAGATGCTAACACTTGTAATC
AGCCCAGTGATTGAAAGAGAGAGTTGGTTAGGAGGTTGTAATAAATCTGATGAATCAATGATAGTAAAACAAGCAGTTTC
CCCTTCTCTGTTTTCTACCTCCGCCATTCACGGCTGAAAAGATCAAGTTTTTCTCTGTTTCGTTTAGTGATCTCAATTTG
AACTGAGCAAATCATAATCACCTTTCATCATCTCCATTATCACCTTTCTAGAAGGCCATTTCCAGTAATTTTGCCTTGCT
TATGTCATTCCTTAATGGTTATCAGCACAGAAGCAGTTCCTCAAGCCACCGACCTGCTCCATTAAACTCATTTATTCCCC
AGTTTAATAGTGTGAATGAATCTCTCCACAAGGTTTATTCAAGTTTTCACAGTTTTTCATCTTCCACAGCATCTCTGGTG
CAGCAAAACAGTCGCTTACTTGCTCAAAGGAAGCGAAGGGCCGGATCTCTTTAGAAGACAATCGCACAGAGAAGTAGTTG
GGCACGATGATGGGTTCAGGGAAGGAGAGAGCGTGAGAGAAGGAACATATCAGGATTCCCAAACTTAGTTCTTTTTTATG
GAACCCA
>c106250_g1
TTCTTTACCTGAATCTCGTTGGATCCTTCTTGCAAATGAAACTTGCTTTCTGGGAAATTTCAGATGGATCAGCTCGTAGG
AGAAGGTACTCAACATCACCGATGTCGCCATTGAGCCCAATGGTTCGACAGCCATAGCCTAGGGGATTTGGTGGACCGAC
TTGCTGCTTTTCAGCAGACGTCAAGGCAAAAAATTCCACCCCCGCTGCTTCCATTTGGGCTGCAACAATGGGTGGCACGC
TGTGATTGACTACCTTAAAGAATCCAAATCCTTCACAAGCCTTCACTATGAGCTGAGAAGTGAGAGATCGTTCAAGTGAG
AGGTCTATAACCGGGATGTCTGGTGACAACCGGCAGCGGCTATTTGAGCCTTGAGACATGGATGTCAGCACCATGTTTCA
GAATTTGAACTGAGAATTAGAGACTTGGGAAGAGGTAGGAGGATAGCATTAAGAGGAGAAGAGGAGCTTTTAAAGGAAGC
TGAAACCTGAAGGGGTTTGAAGAACCAGTGGGAGATTTCTGTCAAAGATCTTCTCCTGATGTGGGGGCCATGAAGTTGAC
CGATTTGAAATTTTTTTTTGGATTGCAAGTCATCAGTTGAGTTGGTCTGTTTTATCTTTTTTAAGATGCTTCTTGGGCTT
AATGTCAAACATTTTATATTCTGGATGAAGTATCTGCACGACATTTTCATCCCGCATTCCAGATGTTGGGGGATCTAAAA
GGCTGTGCAGGAAGGTGAAACGTGTACGGTATGTTGGGGCACAAAATTTCATCACAGAAATATTGTAGAGATGAGATTCT
ATGTGCCAAACGGGTGTGTCACGACCCAATGAATGTTGTGCAAGGCGGCCCACTGGCTCAACCAGGCTTGACTCACAGGG
CATAGCCCAGTTTGGCGGCCCGATTGATAACTTGACCAGAACATTAACCGAGTTCGAAAGAGTTGTTATGGCATTTTTGT
TCTAAAATTTATTGACATGTATGAGGAAATTTTGATCTGTAATCCTAACTCTTGGCCATTGCTGCATGACTAGACCGGGC
GTAGCTGATTCAATGCAATGAAGCCAGGTGCAGCCTGCAGGTCAGGGCTCTGACCCAATTTTTTCTGAGTCCAAAAGTAA
GTCTTCCATTGTTTTGGAGTTTGGGACGGGAGGAGACTGGAGACTGGAGACTACTATTTGATTGATTCGACATTTCTTTG
AATTTTCAAATAAATAAATTTATGCATGCATTTGATTTTCTATTTTCTTGTAGTTTTTATTTAAAATAGAGAGTACTGAT
AAAAGTTTAATATGTAGTTTGAACTTAATG
>c41926_g1
TATCGGCGACACCTTCATGGCGCTGTCTAACGGCATATACAAAAGCTGCTTGCACAGAGCAGTGGTGAACAAGGTGAAAG
AGAGGAAGTCCATCGCCTTCTTCCTCTGCCCGAGAGAAGATAGGATTGTGAGCCCTCCGCAGTGTTTCCTGAGCGAAGAT
CGCCGGAGGAAGTACCCGGACTTCACATGGGCGGAGCTGTACGATTTCACGCAGAACCATTACAGAGCGGACATGGAAAC
CATTCCGAGCTTCATCAACTGGC
>c104197_g2
ACCTGCCTGCCCACCATTTGAAGCATTTCTTCACCGAGCATACGAGCTTACTTCGCCTGAACTACTACCCTCCATGCCCG
GCCCCGGATCTTGCCCTTGGAGTCGGCCAGCACAAGGACCCGGGCGCCCTCACGATCCTCTCGCAGGATGACGTTGGCGG
CCTCGACGTGAAGCGCAAGATCGACGGCGAGTGGGTCCGCGTGAAGCCCATCCCGAACGCATACATCATCAACGTCGGCG
ACATCACCCAGGTGTGGAGCAATGATGCGTACGAGAGCGCAGAGCACAGGGTGTCGGTGAATACAGATAGGGGGAGGTTT
TCCGTCCCTTTCTTCTTCAACCCCGCGCATTATACCATTGTGCGGCCTCTCGAAGAATTGACGAGCGAGCTGAATCCGGC
GAGGTACGAGGGTTACAACTGGGGTCAGTTCGTTAAAGCCAGGGTCAACAGCAACTTCAAGAAGCTGGAGGAGGAAAATG
TACAGATTTCCCACTTCCGAAAGCGGATCGCATGAGTTTCTGATAGTTCCTAAAGATCATGAGGGTCTCAGCAGGAGCTC
TGGTTCTCTGCTGCCATTTATCTTCTCTGTCACTGCAATATTGTCTTTTCACTGTCTATAAGGGTAACTTTGGTGGTTTT
CTTTATTTGTATTTAAATAAGTAGGTCTCATTTCATCTGTGTATCTATGTTAAGAGTAAGTGTGATAATAAATATAAGTT
TACTGTCTTTTTGTTTTCTATACATGCCTTTTGAACTGGATGATTATGATATCTATTTTCCCAGTCTTTACCCTTTGATG
AACATTGAACAAAATGTTAT
>c109681_g1
ATCTTAGGATCTTAACAAGCAATAAGAAGATGCGAGAAATAAGAGCATATAAGGATATTATTAGCATTAATACAACATCC
GTTGGACATCCAGTTTCACTCCAAACAGCCATGGAAATGGAGCAAGAACAGAGACACCAGTAATTGGAACCATTGTTGTT
AGTAAAACTACAAGAAGAAGAAGAATAGGAAAAATACAATAGCATTCAGCATTCGTCCCATCTGTGCTTCAGCCAGAGCT
TGAAGAAACGCCATTGATGCAGAAGAACCTCAAGTTATAACAGAATTTAGTGATAGCTCCTCCTGCTCTGAAATCAAATG
AAACTCCTTCAATTGCAGAGCTTCTTCTCAGAGGCTGACGATCCCTCTAAGCAAGGGCTCAAGAAGAGCTGGAACGACAT
GGATTGTGGAAGCAAAAAACACATATATACTATCTTTGTTATATGCTGCTGTGCAACGCTGCTGCCGCTCACAAATCCCG
CCTCACAAAGCTCCTGATCTCTTCCATTACTTCATGGTAGTGGTTGGTGTTCGGCAGGAAGTAGAAGCCGATCGTAGCCT
GCTCCCTATAGAGAAGCCGGACTTCGTGACCGGCATTCTTCAACCCCTCCTCGTAGGCTAGCTGCCAGTCCTGTGTTAAG
TCCAAGCTTGCCACCACGAGCAGCGTTTTCGGAAAGGGGAGCCCCTCGAGCTTGATGCCGTGAGGGCCGAAAGGGTTGCA
GGCCGGGTGATCCCGATCAGCTCCCTCCGGGAGAAAAGCCCTCCAGTACCAATCCCTGTCCTGCAATGCAACAAAGTATT
TCCCGTCCAGCGTCAGCTCGGATTCCGTTCTCTTGTTGCCGCCGAACAGTGGGTTCAAAAGGATGTTCCCTGAGATATGG
ATTCCGGATTCGACGGCCCTGACTGCAACATGGTGGACAATATTTCCCCCCGAGCTATCGCCGGCAAGAAAAACCCGAAG
ACTGCCATCCCTGCCGCTGCGGAGCCATGGCTGAGAGGTTGCCCACTTGAGAGCAGTCCATCCATCATCGTACGCGCAAG
GGTAACGGTATTCGGGAGAACGCCGGTAGTCGACGGAAATAACCACCGCACCACCGCAGAGTGTGACGAAGCGGCGGCAG
AGAGTGTCGTAGATGGCGCTGCTCGAGGTGGAGTGGGCAAAGCTGCCTCCATGGAAGAAGATGATCACTGGAAAAGGGTT
CGGGGAGGGGGCTCTCTGGAGCTCATAGATGGCGGCTAGCTGGGGAAGCTCGGCGTCACCGGAAGCAGGAGCCGGGCAGT
AGATTCGAGCAAGGAGGTTTGTCTGGCGGTCGAGAACGCGGTCGAAAGAAACAACGCCGTTCACCGGAGAAGCGTTGGCC
TGCACTTTGCGGTCGAGAAATTCGGCAAGGTGGCGGTCGAAACTGCCGTCCGGGCGGCGGAGCATGTTGTAGGCGACTTT
GAAGTTGGAGATCAGGACAAACGTGTTCAGAGGCACCACCATCCTGGACTCGTTCGCGTTAACTTCGTTGCCTCCTGCCA
TGGCGATTCCTTTCTCACGCGGACGTAGCAGCAGAAGCAATCGAAGAAGAAGAATGAAACAGGAGCCGAGCCAGTAAAGG
TCCCACCTTTGTTCAATCCCGGGACCAAAGGGCGAAAACCCTGGCAAAAATCATGAAAACTCGGCTCCCAGAAAAGCTTC
TTCTCCTCGCTGATCCCGCGGCCCTCTCTGCCCGGGATCGGAAATTCGGTACCTTGTTCCTCGAGAGCAGCAAGCCACAG
CCCTCTCTCCTGGCAGGCGGCGGGGGAGATGAGAATGATCGAGGCGGAGGGGGCAGAAGGAGGAGAAGGTTAAGAAGAGG
ACAGATAGCGGAGCACGCGAGCCGAAGGAAGAAGGGACGAGTCAAAGGTTGGAGAGAGAATAAGAAGAAGTAGAAGACGA
CGACGAGGAGGGGATAGAAAGAGAGAGAGAGGGCGTAGAAATGACAACCGAGAGAGACGACAAAACGAGGCGACACCGTC
ATAATGAAACTGCAGGGCGGGTCCCGCCGGCCCTTCGCGTGGGCGAAATTTCGACGAATAAGCACCGCTTGTAATTTTCT
TTTTCTTTTTTCCAAAACTGCTTCCTTTTCCCCCCAAAACAGCTTCCTTTATTTTTTCTTTTGATTCCCTTTTGAAGTAC
ACGCCCATTTTTCGTAAGTCCACGCCTCTGACCCAAAGAAACAAGAAGCTGATGATGAATAAGCTTGAGAAGTAGAAGAA
TAAAAAAGTAGAAGCGGAAGAAGATGAT
>c106769_g1
TTATTTGTTAATGTCATCTCCAAGCCTCCAATTTGAGCAGAACAAAACTAAGTGGAAGAAGAGCTTTAACAAAGAAGCCA
TATGTGACCTCATAAAGAAGAGTACACAACTTTTTTCTGAGATTTACAGAATGGAGCACACAAAAAAAAACTTTCAAGCT
TGAATGGTTCCTTTCTTGACTTAGAAAAGGGTTAGGTGCTGAGATCTTTTTTTTGGTTAGTGTGTGTTGGCCAGAGAAAA
TGATAGCAAGGGTCACTTGTTGTCAGCTAGGGTGCATTGAATTTTACATGGTCCCTAAATTTATGCCACCTCAGTCCTTC
AAACAGCTCATGCAAAGGACATGCTAGGGGCATAAATGACCTTTCAGGTAAAATTATGGACCATGTTGAAAAGTGACCAT
TACGATCATTTACGACGGTTCGGTTCAGTTAAATATAATTTTTTTTTTAAATAAAGAGTAATTCTAATGGCACTTGGGAA
ATCGCGGAAGATTGCAGGGGGAAGGAGAACCCCTTGCTTATATTTAACAAACTCTGAACCCTAGATCTCTGATCACATGC
GAGAAACGTGCAATCTTTCGCCTTTTGGCCTGTGATTCAAAGTTTTTTTTTTTCATGATTTAAAAATTTTGGTCTAAAGA
AGAAATCTTGAGAGCCCCACTTTGTAGCCGGTTGTCCTGACATCTTCTTGCACCTGTGCCCTGAACTCTCTAAAGGTGAA
CTTTTTGTAGCGTGAAGGCTCCTTGCAGCTCTCTATGATGGTGTCATATGAAGGGCATAGAAAGAAGGCTACGGAGTATC
TCTCCACCTTCCCATTAGTCATCACCCTGTGCTCTACGCTCTTGTACACATCATTGCTCCATGCCTGAAAGAGATCCCCA
ATGTTGACAATTAGGGCTTCTGGGTTGGGCTTTATGGAGACCCAATTGGAATCCTTCATCAGCTGGAGGCCGCCGACATG
GTCCTGGTGGAGAATAGTGAGAAAATCGCTGTCTGTGTGGGGCACGAGACCCATGATATCGCACATAAACGGGCATGGCG
GGTACCGATTGAGGCGGAGGAAGCAGGTGCTCTCATTGCAATACTCTGCGAGCAAGTCCCGGGAACAGCCCAAGTTTTCG
ACCAGAATGGCCGCCAGCAACCTCGCCAGTTTGGACATGGCGCTTGCAACCTTCTGCATCTTCTCCCTTAATGATATGAA
CTCTTCTTCTTCTTGGCGGCAAACTCCGCCAGAACCAAGCATAGAAAGAGGGACATGGAAGGCTTCTGACCAAGAGAACT
GATCAAGCGAAGTGGCCGTCGGATTCCCCCACCTGTACGACTCATTCAGCACCGCCGAATCCTCTTTCTTCTCAAAAGGC
ACGCGAAACAGCCTCTCCTGCTCCCTCCTCATCTCCTGCAAAAGCCGGCAGCTGACGCCGTGGTTCACCACCTGGAAAAA
>c113840_g1
GAAAACTGAAAATTAATTATAATTTTGACACATTTGATACTTATTTATTCAATGAGGCTCATTAGTCTTGTAATGAAATG
AATGGAAGCATTATCCAAATTTATGAATCTCATAATTCTCTCACCTCCATCATTAGCCAGGTGTCCCCGTCGTTCTCTTC
CATTATAAGCAGGCCGAGGAAAAAGAAACTCCCCCCTTTCGCTCTTTTCTCGCTCTTCTCCGTCTCCGGCGCGATTCGAT
ATGGCCGAGAGTTCCTACAGTCAGGGATCCGGCGACGGCAAATCGATCTCGGCCCCGCCGGAGATTGACGGTCTTCTGGC
CGGCGTCGGATACACCGTCCGCCCATCAGACCTCCGTCACGTCGCGGAGCGACTCGAGAAGCTCGATTCGGCCATGATTG
CAGCAGCCGCAGCCGGGCTTCCGCCGGAATTTCTCTGCTCGGGCGCCGTTCACTACAACCCTTCGGATCTCGCTGCCTGG
GTAGAATCCATGGCCATGCTCACCGATCTCTCTCCTGACCATTTCCCCCAGACCAACCCCGCTCCCGCCACTTGGTCGGG
TGAGATCTGCCATCCAGCGCCCGCGTCCCCGCCGCCCGCCGTCATAGTTGATGCTAAGCTTCCGGAGGATGCTGGTATCA
GCCTGGTTCACCTTCTTATGTCCTGCGCTGACTCCATCCATCGCGGCGACCGCCTTACCGCCTTAACCCTAATCAACGAG
ATGCATCTCCTTCTTCCTCGGGTCGGCACCGCATTCGGCATCGGGAAGGTCGCTGGCTACTTCATTGACGCCCTCGACCG
CCGACTCCGGTGTCGCCCTCTCCTTGAGGAAGACGAGATCCCCTACCACTACTTTTACGAATCGAGTCCCTATCTCAAGT
TCTCCCACTTCACCGCGAACCAGGCGATCCTAGAAGCATTCAACGGCTGTGATCGTGTCCATGTCATCGATCTGAGCCTG
AAGCACGGCCTTCAATGGCCTGCTCTTATCCAAGCTCTCGCCCTCCGGCCAGGGGGTCCGCCGGGTTTCCGGCTTACAGG
TATCGGTCCACCGGCCGTTCGAGACTCGCTCTGCGAAGTCGGCCGGCGGCTTTCGGACCTCGCCCATTCCGTCGGCGTCC
CCTTCACCTTCTGCGGTGTCATCGCCGCCCGGCTTGAAGAGGTCAATCTGTGCTCGCTCCGGTTTGAGCCTGGCGAGACA
TTGGCGGTCAACTCAGTTCTACAGCTCCACCGCCTCCTCACCGACCCTGGCTCTCCCAGCCCAATCGACTCGGTGCTCAG
CTGGCTCAGGCAGCTCCGGCCCAGGATCGTTACAGTGGTCGAGCAAGAGGCGGACCACAACCGCCCCGTCTTCCTCGACC
GGTTCACAGAGGCCCTCTTCTACTACTCGACTGTCTTCGACTCACTGGAAGCTTCCGCCGCCGGCGGGCCGGCGGAGGCT
TACCTGCACCGGGAAATCTGCAACATCGTGTGCAGCGAGGGGGCGGACCGATACGAGCGCCACGAGCCGCTGGCTAACTG
GAGATCCCGCTTCTCCCGGGCCGGGCTATGGCCCGTTCATCTCGGCTCAGACGCTTTCCGTCAGGCCAGCATGCTCCTGA
CGCTTTTCTCCGGCGAGGGCTACGGCGTGGAGGAGGTGGACGGATGCCTAACCTTGGGCTGGCACGGCCGCGCCATCATC
TCAGCCTCTGCCTGGCATGCCGGCGATGACGCGGATGCGCCGCCGCCAACCACCGGAAATCTTTTCTTTAATGAATTTAG
CAGGTCTGTTACCGGGGAGAGCAGTGGCAGTAATCGTGATAATGCGCGAGTTGTTTCTCAAAGAGAACATAGCTTGTAAT
GTAACTGTTAATAAAATTCGCATTTTGTATATTTTTTTTTAAAAATAAGCTAATTATCTTTTAACTATTTATATTTTTTT
AAAAAAAATTTGATTCTAA
>c111827_g2
TTCATGTTGACCACTTTTTGATTCGAAGCTCGGATGACCCTTAAAATCCATCAAAAGCTCCGGCTGTTAGGTTATGCGAA
AAGTTGAGTTGGAGTCGGGAAGTTTTGAGCCAAGAGTGACCCCACTTTTGCTGTCAATTTGTTATTACTAATGTAAGACT
AGTTTTATCCAAAAACATATTCTGCGCTCATGGCATCTTCCAATTAATATCCATAGCCCCCATTAGATTGAACGCCTCCT
CTGCAAGTAGCTGTCAAAGAATGCAATAAAGAAAGCAGCTGAAGCTATAAAAATGGCAGGGAGGCTCCACCTGGCCCCCA
TCGAAACCACAGAATAAGATTTTAACAAAGCAATAACAAAAAACTCCCAACAAATTCCAAAGGTTAGGTGAAGTCCTCTT
TAATGGCGCAAAGACACGAGCAGAGACGAAGGCTCCATGTGTTTACCTTGTAAGAAGCATCCCTAGCCCAGAGGATGTAC
CCCATAATATTAGTGACCCATAAGTTAGTCCAAAGATAGCTCAAATACCTATTTTTAGTACAATGAATTGCATTTAAATG
ATAATATCTACTACTTTTTGGTTAAAAAAGAGATTTTTTTTAGTTAAAAACTTCAGGATGGATGAGCCTGACCTCCTGAC
CTGCTCCTCCTCCATTCCTGCTCCAAAATACTTCCAACAAACATCAATTAGATCCCTCTAATAATATGCATGCAAACAAA
ACTAGCAGTTCCTTTGCTCTTCCCATTACTGTTTTCCTCAGAAACAAACACCCTTTGTAACAGCAGAATCCAAAGCTTTC
CTGTTTTTAATATATGATGTATATGAACCATGCCATGCCTGTAATTAGAGCTTTATTCATGGAGCAAGAAGATATTTGGT
TTGATATTTGCTTAACAATTGGACATGATAAATTCTCTGATCTCCTCCATTACTTCATAGTAGTGGTTGGTGTTAGGCAA
GAAGTAGAACCCTATCGTAGCCTGCTCCCTGTAGATAAGCCTCACGTCGTGGCCGGCATTCTTCAAACCCTCTGCATAAG
CCAGCTGCCAGTCCTTGGTCAGGTCCAAACTGGCAACCACCAGAAGGCTCTTTGGGAACGGGAGCTCGTCGAGCTTGGCC
CCGTTGGGGCCAAAGGGATTGCAGGCCTGGTGATCGCGGTCAGCTCCATCGGGGAGGAAAGCTTTCCAGTACCAATCTCG
GTCGTTCAAAGAAACGAAATACTTCCCATCCAGCTTGAGCTCTGAGTCCGTCCTCTGAATTCCTCCGAACAACGGGTTGA
GGAGAATGTTCCCTGATATGTGGATGCCGGATTCAATGGCTTTCAGCGCAACATGGTGGGCAATGTTGCCCCCAGAGCTG
TCGCCGCAGAGAAAAACCCGGAGCTTGGCATCCTTGCCGCTGCGGAGCCAGGGTTCGGAGGAAGCCCATTTCAATGCAGT
CCAGCCATCATCGTAAGCACAGGGGTAGCGGAATTCAGGAGATCGGCGGTAGTTGACTGAGATGATTACGGCACTGCTGC
AGAGGGTGACGAAGCGACGGCAG
>c89242_g1
GAAAGAGAGAGAGAGAGAAAGAGGTTACTTTCTTCTCATTTAAACTGATAAAACGGGATCGTTTATTCTTTACGCAAACC
AGCTTTTTTTTCTTCCTCTTTACCGAGCAGCAACTCTGCGTGCGAGTCTCTGCTTGTATCGATACCTTTTTCTCTCTTCA
GTCGACGGAGGAAGAACAGGGATTAACCCTATTTATCACTCTTCGGCATCTTCACTTTTGCTGTTTATCTATCCATCGGT
GACTATTTCAAGGTAGGGTTTTTGAAGGGCGTGCCCATCACGAGAGTCACTTCTTTTCTTCTTGCATTCCACGAAGCTGT
GCGGCGGCGGCGGCGGCGGTGGCAGTGGTTGCAGAGCGCTACTCGGCCTTGATCCCTTTTTCTTTGTCGGAAACGGAGGG
GGAATGAAGAGGGAGCACTTCGAGAGCAGCGGCAGAGCGGGGGGCGGGGGTTTTCCGCTCTCGAAGGGGAAGATGATAGG
TATGGAGGAGGCGGACGCCGGGATGGATGAGCTGTTGGCGGTGCTGGGGTATAAGGTGAGATCGTCGGACATGGCGGATG
TGGCG
>c105719_g1
AGCACAAAATTGTATTTAAAATTGATCTGATATCTTTCCACTACTTAAAAACATAATAAGGAGACAAATGCGATGATGCA
AGTTGCAACAAAATTATTATATAAATGAGCTTATAATAACAACAATAAGTAAACTAAAGCTAATCACAACGGCAAGCACT
ATTAGAATACGAAAATCAAATAGCTGGACAGGAGTCTTCAAGATGGTGATATGGAAAGGGGCTGCCGGAGCTTGAGCAAG
CTTGAGCACGGATCGCACCCATTGTAAGCGGGTCAGGTGGACGGGGATCTTAGCGTTTTGATCGTCGTCTTCGAATTCTG
TTAATTTATGTTCTGTTCTTGGTGTCGAGGATCGAGCGTCCAAGTTTTGGATGGATGCTTGCATTATTTGGCAGGTGATA
TTTTTTTTAAAAATTGAGCTGATGCTCTTAATTGACATATTTGCTGTTTTGTGTGCTGCTTCGGTGGGTCCCACATTGGC
TGCGGACGGTCTTCCACGCTGGCCCTTAGGATTTCCTCTGCCCCTGCCCTGCTCCCCACTTTCCCCCCTTTAAGAAATCG
CTGTAGCCAACCGAACAGCGTATCAGCTTCATCTTCTCCACTATAAAACAAGAGACGAGCGAACCATCTCGGGAACTAGA
AAGAGTAGAGGAGGGGGGCAAACTCCAACAACTGAAAGGAAGAAGCCAAAGCCGCCTGAAATATGTTACGCCGCCGGGCC
GACGTCGGGCCCCCAGATTCTTCACAATGTCCGCCAGTCGAAGAAGCTGACGAGTGCGGGATGTCGACATCGCCGCCGTC
GGCGCTGGTGTTCGACGCGGTTGTTATGAGCCAGCAAGCAAATATACCTTCGCAGTTCGTGTGGCCGGAAGAGGAGACGC
CGACGCCGGGCGTGCAGGAGCTATCGATTCCCCTCATCGACCTTGACATGTTTCACTCCGGCCGGCCCGGCTCCGCCGCC
GAGGTGGCCCGGCTTGTGAGGGAGGCGTGCGCCACGCACGGGTTTTTTCAAGTGGTGAACCACAGCATCGACCCAATGCT
TCTCGCGGAGGCCCACGTCTGCGTGGATGCCTTCTTCTCGATGCCTCTATACGAGAAGCAGAAGGCGCAGAGGAGTCCCG
GCGAGAGCTGCGGTTATGCAAGCAGCTTCACCGGCCGCTTCTCCTCTAAACTCCCCTGGAAGGAGACCCTCTCCTTCCGC
TTCTCCCCCTCATCCTCTTCCATTGTGCTCAATTATTTCGTCGGCATGCTCGGCGATCAATTCAGGCATTTTGGGGAGGT
GTACCAGGATTACTGCGAGGCGATGAGCACGCTGTCGCTGAAGATAATGGAAATACTTGGGATGAGCCTCGGCGTTGGCC
GGGAACACTTCCGGGACTTCTTCCAGGGAAACGATTCAATAATGAGGCTCAACTACTACCCGCCATGCCAGCAGCCCGAG
CTCACGTTGGGGACTGGCCCCCACTGTGACCCGACCTCTCTTACCATTCTCCACCAAGACGACGTCGGCGGTCTTCAGGTT

## Sheet: Figure S2
Figure S2. Volcano plots of differently expressed genes (DEGs)
